1 **Title**

2 Optimizing EEG source reconstruction with concurrent fMRI-derived spatial priors

3 **Authors**

4 Rodolfo Abreu<sup>1</sup>, Júlia F. Soares<sup>1</sup>, Sónia Batista<sup>2,3</sup>, Ana Cláudia Lima<sup>3</sup>, Livia Sousa<sup>2,3</sup>, Miguel  
5 Castelo-Branco<sup>1,2</sup>, João Valente Duarte<sup>1,2,\*</sup>

6 **Affiliations**

7 <sup>1</sup> Coimbra Institute for Biomedical Imaging and Translational Research (CIBIT), Institute for  
8 Nuclear Sciences Applied to Health (ICNAS), University of Coimbra, Coimbra, Portugal

9 <sup>2</sup> Faculty of Medicine, University of Coimbra, Coimbra, Portugal

10 <sup>3</sup>Neurology Department, Centro Hospitalar e Universitário de Coimbra, Coimbra, Portugal

11 \* *Corresponding author*

12 Email address: joao.v.duarte@fmed.uc.pt

13 Phone number: +351 239 488510

## 14 Abstract

15 Reconstructing EEG sources involves a complex pipeline, with the inverse problem being the most  
16 challenging. Multiple inversion algorithms are being continuously developed, aiming to tackle the non-  
17 uniqueness of this problem, which has been shown to be partially circumvented by also including fMRI-  
18 derived spatial priors in the inverse models. However, only task activation maps and resting-state networks  
19 (RSNs) have been explored so far, overlooking the recent, but already accepted, notion that brain networks  
20 exhibit dynamic functional connectivity (dFC) fluctuations. Moreover, there is no consensus regarding the  
21 inversion algorithm of choice, nor a systematic comparison between different sets of spatial priors. Using  
22 simultaneous EEG-fMRI data, here we compared four different inversion algorithms (MN, LORETA, EBB  
23 and MSP) under a Bayesian framework, each with three different sets of priors consisting of: 1) those  
24 specific to the algorithm ( $S_1$ ); 2)  $S_1$  plus fMRI task activation maps and RSNs ( $S_2$ ); and 3)  $S_2$  plus network  
25 modules of task-related dFC states estimated from the dFC fluctuations ( $S_3$ ). The quality of the reconstructed  
26 EEG sources was quantified in terms of model-based metrics, namely the free-energy and variance  
27 explained of the inversion models, and the overlap/proportion of brain regions known to be involved in the  
28 visual perception tasks that the participants were submitted to, and RSN templates, with/within EEG source  
29 components. Model-based metrics suggested that model parsimony is preferred, with the combination  
30 MSP+ $S_1$  exhibiting the best performance. However, optimal overlap/proportion values were found using  
31 EBB+ $S_2$  or MSP+ $S_3$ , respectively, indicating that fMRI spatial priors, including dFC state modules, are  
32 crucial for the EEG source components to reflect neuronal activity of interest. Our results pave the way  
33 towards a more informative selection of the optimal EEG source reconstruction approach, which may be  
34 crucial in future studies.

# 35 1 Introduction

36 Electroencephalography (EEG) measures the electrical potential differences between electrodes  
37 placed at different scalp sites that are generated by an ensemble of brain cells acting in synchrony. Because  
38 of its fairly direct relationship with neuronal activity and its remarkable temporal resolution at the sub-  
39 millisecond scale, EEG has proven pivotal for studying both healthy and abnormal human brain function in  
40 general, and particularly brain functional connectivity and its dynamics (Niedermeyer and Lopes Da Silva,  
41 2005). However, the spatial identification and characterization of the brain networks underlying the  
42 electrical potentials measured at the scalp are not possible from these scalp signals alone, given the poor  
43 spatial resolution of the EEG at the centimeter scale (Michel et al., 2004). Fortunately, the continuous  
44 technological advances of EEG hardware and signal processing techniques now permit a reliable  
45 reconstruction of those brain networks (Abreu et al., 2020b), by localizing and estimating the strength of  
46 the neural generators responsible for the scalp EEG signals – the so-called EEG source reconstruction  
47 (Michel and Murray, 2012).

48 Reconstructing EEG sources involves a complex pipeline that can be divided into the forward and  
49 the inverse problems. The forward problem relates with the estimation of the impact of a given source in  
50 the brain on the scalp electrical potentials, and is typically solved by building realistic and subject-specific  
51 head models from individual structural magnetic resonance images (MRI) using well-defined processing  
52 pipelines. By incorporating the 3D localization of the scalp electrodes on these head models, a lead field  
53 can then be computed, establishing the relationship between the activity of the different sources in the brain  
54 and the signal measured at each electrode (Michel and Brunet, 2019). Conversely, the inverse problem  
55 relates with determining the sources in the brain that generate a given scalp distribution of electrical  
56 potential differences (i.e, EEG topography). Because of the non-uniqueness of its solution, the inverse  
57 problem is considered the most challenging, with a plethora of inversion algorithms being available for  
58 solving it (Michel et al., 2004). These can be roughly divided into current source density (CSD) estimates  
59 and beamformers (Grech et al., 2008; He et al., 2018). Despite the choice between the two types being

60 application-dependent to some extent (Halder et al., 2019), CSD-based algorithms are the most commonly  
61 used in the literature; within these, the more recent distributed source localization algorithms are preferable  
62 over dipole source localization algorithms, as the latter require prior knowledge regarding the number of  
63 sources to be estimated. Several distributed source localization algorithms have been developed, the most  
64 common being the minimum norm (MN) solutions (Hämäläinen and Ilmoniemi, 1994) and their variations:  
65 weighted minimum norm (WMN; De Peralta-Menendez and Gonzalez-Andino, 1998), low resolution  
66 electromagnetic tomography (LORETA; Pascual-Marqui et al., 1994), local autoregressive average  
67 (LAURA; De Peralta-Menendez et al., 2004), among others (Michel and Brunet, 2019). However, there is  
68 no consensus regarding which algorithm yields the most accurate source reconstructions, and only a few  
69 studies have dedicated to systematically compare their performance. Motivated by the challenging task of  
70 defining a ground truth, most of these studies used simulations and reported inconclusive results, with the  
71 selection of the best algorithm highly depending on the simulated conditions (Bradley et al., 2016; Grova  
72 et al., 2006; Halder et al., 2019; Yao and Dewald, 2005). Similarly, the optimal inversion algorithm for  
73 reconstructing real EEG data has not been found yet (Hedrich et al., 2017); moreover, the associated results  
74 have not been appropriately validated based on the brain activity of interest, but rather using unspecific  
75 measures, typically the localization error, spatial spread and percentage of false positives, as well as the free  
76 energy and variance explained of the inversion model used when considering Bayesian frameworks (Michel  
77 and Brunet, 2019). Importantly, no study has focused on determining the extent at which the effects of  
78 different source reconstruction algorithms differ between groups in clinical studies. This is especially  
79 relevant in task-related fMRI studies, which are rapidly increasing in clinical research (Marinazzo et al.,  
80 2019).

81 In order to tackle the non-uniqueness of the inverse problem, assumptions and constraints need to  
82 be considered, which are reflected differently on each inversion algorithm. Their incorporation can be  
83 performed using two different approaches: by imposing penalty functions (Valdés-Sosa et al., 2009), or  
84 using a Bayesian framework (Friston et al., 2008; Trujillo-Barreto et al., 2004), particularly the parametric  
85 empirical Bayesian (PEB; Henson et al., 2010; Phillips et al., 2005). Although less popular, the PEB

86 framework allows to describe a given assumption or constraint explicitly through appropriate postulated  
87 prior distributions, which can range from one as in the MN solutions (the identity matrix) to hundreds as in  
88 the multiple sparse priors (MSP) algorithm (Friston et al., 2008). This framework is thus extremely flexible  
89 for incorporating additional priors obtained from other imaging modalities, which has proved to be crucial  
90 for more efficiently circumventing the non-uniqueness of the inverse problem (Lei et al., 2015). The first  
91 studies used brain activation maps obtained from the analyses of task-based functional MRI (fMRI) data  
92 (Henson et al., 2010; Lei et al., 2012, 2011, 2010). More recently, the well-known brain networks that  
93 emerge from temporally correlated spontaneous fluctuations in the blood-oxygen-level-dependent (BOLD)  
94 fMRI signal (the so-called resting-state networks, RSNs) have also been used as spatial priors (Lei, 2012).  
95 In these studies, the spatial priors were derived from separately acquired fMRI data, which may scale down  
96 their potential for guiding the reconstruction of EEG, especially when focusing on spontaneous activity  
97 (Abreu et al., 2018). Additionally, task-based and resting-state functional networks are now known to  
98 continuously reorganize in response to both internal and external stimuli at multiple time-scales, resulting  
99 in temporal fluctuations of their connectivity – the so-called dynamic functional connectivity (dFC)  
100 (Hutchison et al., 2013). From dFC fluctuations, a limited, but variable, number of dFC states have been  
101 recurrently identified in the literature as the building blocks of brain functional connectivity (dynamics)  
102 (Preti et al., 2017), which are hypothesized to be associated with different cognitive, vigilance or  
103 pathological brain states (Thompson, 2018); however, they have not been considered as potential spatial  
104 priors for EEG source reconstruction so far.

105         Given the increasing relevance of EEG as a brain imaging tool, accurately estimating the underlying  
106 brain sources is critical in the study of both healthy and clinical populations. Considering the present  
107 limitations described in this section, here we compared four different inversion algorithms (MN, LORETA,  
108 empirical Bayes beamformer, EBB; and MSP), each with two different sets of additional fMRI-derived  
109 spatial priors (activation maps and RSNs, with and without including dFC states) on EEG data collected  
110 concurrently with fMRI at 3T from 6 multiple sclerosis (MS) patients and 7 healthy subjects performing  
111 visual perception tasks and during rest. The quality of the reconstructions was quantified through the free-

112 energy and variance explained of the associated models, and in terms of the overlap between EEG source  
113 components and brain regions of interest associated with the tasks and RSN templates.

## 114 **2 Materials and Methods**

### 115 **2.1 Participants**

116 Six MS patients (mean age: 30±8 years; 2 males) and seven demographically matched healthy  
117 subjects (mean age: 30±6 years; 3 males) were recruited. The patients were selected by the clinical team at  
118 the Neurology Department of the University Hospital of Coimbra, and met the criteria for MS diagnosis  
119 according to McDonald Criteria (Thompson et al., 2018). All participants had normal or corrected-to-normal  
120 vision. The study was approved by the Ethics Commission of the Faculty of Medicine of the University of  
121 Coimbra, and was conducted in accordance with the declaration of Helsinki. All participants provided  
122 written informed consent to participate in the study.

### 123 **2.2 Experimental protocol**

124 The imaging session was performed at the Portuguese Brain Imaging Network (Coimbra, Portugal)  
125 and consisted of four functional runs: first, a functional localizer of the human middle temporal area  
126 (hMT+/V5, a low level visual area well-known to respond to simple motion patterns), followed by two runs  
127 of biological motion (BM) perception, and one final resting-state run.

128 The localizer run consisted of 10 blocks of 18 seconds, with each block comprising three periods:  
129 the first was a fixation period marked by a red cross positioned at the center of the screen for 6 seconds.  
130 During the second period, a 6 second pattern of stationary dots was shown, followed by the third (and final)  
131 period during which the dots were moving towards and away from a central fixation cross at a constant  
132 speed (5 deg/sec) for 6 seconds.

133 Biological motion stimuli were built based on human motion capture data collected at 60 Hz,  
134 comprising 12 point-lights placed at the main joints of a male walker. Each BM perception run consisted of  
135 12 blocks of 40 seconds: 4 or 5 blocks (depending on the starting block) of the point-light walker facing  
136 rightwards or leftwards (*body* blocks), 4 or 5 blocks showing only the point-light located at the right ankle  
137 and moving rightwards or leftwards (*foot* blocks), and 3 blocks of the original 12 point-lights randomly  
138 positioned across the *y* axis, while maintaining their true trajectory across the *x* axis (*random* blocks). A  
139 total of 9 *body*, 9 *foot* and 6 *random* blocks were then collected during the two BM perception runs.

140 During the resting-state run, the participants were instructed to relax and only fixate a red cross  
141 positioned at the center of the screen.

## 142 **2.3 EEG-fMRI data acquisition**

143 Imaging was performed on a 3T Siemens MAGNETOM Prisma Fit MRI scanner (Siemens,  
144 Erlangen) using a 64-channel RF receive coil. In order to minimize head motion and scanner noise related  
145 discomfort, foam cushions and earplugs were used, respectively. The functional images were acquired using  
146 a 2D simultaneous multi-slice (SMS) gradient-echo echo-planar imaging (GE-EPI) sequence (6× SMS and  
147 2× in-plane GRAPPA accelerations), with the following parameters: TR/TE = 1000/37 ms, voxel size =  
148 2.0×2.0×2.0 mm<sup>3</sup>, 72 axial slices (whole-brain coverage), FOV = 200×200 mm<sup>2</sup>, FA = 68°, and phase  
149 encoding in the anterior-posterior direction. The start of each trial was synchronized with the acquisition of  
150 the functional images. A short EPI acquisition (10 volumes) with reversed phase encoding direction  
151 (posterior-anterior) was also performed prior to each fMRI run, for image distortion correction. Whole-  
152 brain, 1 mm isotropic structural images were acquired using a T<sub>1</sub>-weighted 3D gradient-echo MP2RAGE  
153 sequence.

154 The EEG signal was recorded using the MR-compatible 64-channel NeuroScan SynAmps2 system  
155 and the Maglink<sup>TM</sup> software, with a cap containing 64 Ag/AgCl non-magnetic electrodes positioned  
156 according to the 10/10 coordinate system, a dedicated electrode for referencing placed close to the Cz  
157 position, and two electrodes placed on the back for electrocardiogram (EKG) recording. Electrode

158 impedances were kept below 25 k $\Omega$ . EEG, EKG and fMRI data were acquired simultaneously in a  
159 continuous way, and synchronized by means of a Syncbox (NordicNeuroLab, USA) device. EEG and EKG  
160 signals were recorded at a sampling rate of 10 kHz, synchronized with the scanner's 10 MHz clock. No  
161 filters were applied during the recordings. The helium cooling system was not turned off, as it may carry  
162 the associated risk of helium boil-off in certain systems (Mullinger et al., 2008), and thus is not permitted  
163 in some clinical sites as the one used in this study. Respiratory traces were recorded at 50 Hz with a  
164 respiratory cushion from the physiological monitoring unit of the MRI system.

165 For each participant, 192 fMRI volumes were acquired during the localizer run, yielding 3.20  
166 minutes of duration. The two BM runs had approximately 8.37 minutes, thus comprising 507 volumes each.  
167 The final resting-state run had approximately 8.08 minutes, corresponding to 485 volumes.

## 168 **2.4 MRI data analysis**

169 The main steps of the processing pipeline for deriving fMRI spatial priors (described here) and  
170 subsequently use them in EEG source reconstruction (described in the next section), as well as the metrics  
171 proposed for quantifying the quality of the source reconstruction, are depicted in Fig. 1.

### 172 **2.4.1 Pre-processing**

173 The first 10 s of data were discarded to allow the signal to reach steady-state. Subsequently, slice  
174 timing and motion correction were performed using FSL tool MCFLIRT (Jenkinson et al., 2002), followed  
175 by a B<sub>0</sub>-unwarping step with FSL tool TOPUP (Andersson et al., 2003) using the reversed-phase encoding  
176 acquisition, to reduce EPI distortions. The distortion-corrected images were then corrected for the bias field  
177 using FSL tool FAST (Zhang et al., 2001), and non-brain tissue was removed using FSL tool BET (Smith,  
178 2002). Nuisance fluctuations (including physiological noise) were then removed by linear regression using  
179 the following regressors (Abreu et al., 2017): 1) quasi-periodic BOLD fluctuations related to cardiac and  
180 respiratory cycles were modeled by a fourth order Fourier series using RETROICOR (Glover et al., 2000);  
181 2) aperiodic BOLD fluctuations associated with changes in the heart rate as well as in the depth and rate of



182 respiration were modeled by convolution with the respective impulse response functions (as described in  
183 Chang et al., 2009); 3) the average BOLD fluctuations measured in white matter (WM) and cerebrospinal  
184 fluid (CSF) masks (obtained as described below); 4) the six motion parameters (MPs) estimated by  
185 MCFLIRT; and 5) scan nulling regressors (motion scrubbing) associated with volumes acquired during

186 periods of large head motion; these were determined using the FSL utility

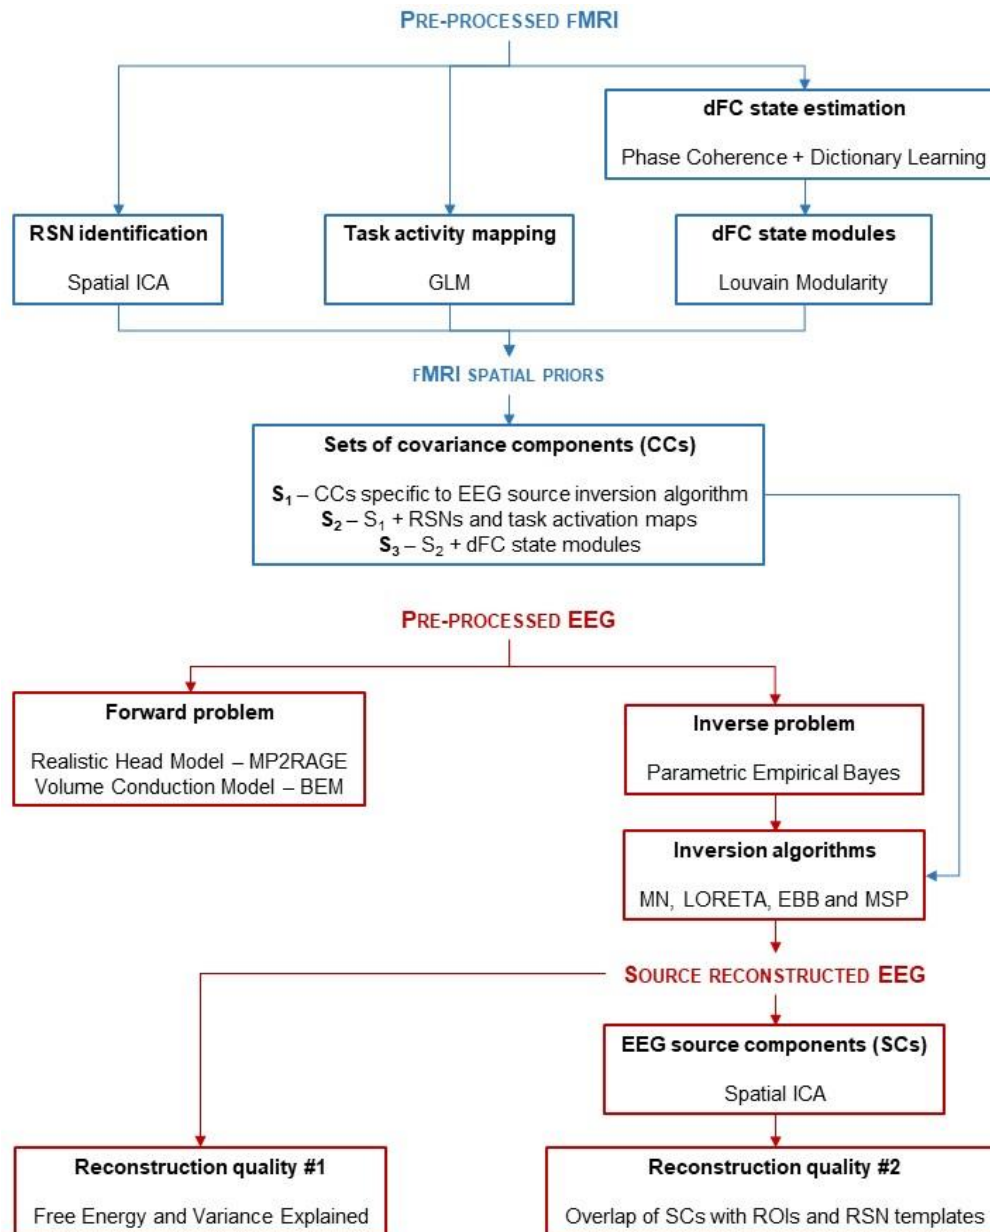

187

188 **Figure 1: Schematic diagram of the processing pipeline.** The pre-processed fMRI data is submitted to three different  
 189 analyses in order to derive three types of fMRI spatial priors for EEG source reconstruction: 1) identification of RSNs  
 190 through spatial ICA; 2) mapping of the task-related activity through GLM; and 3) by estimating the dFC fluctuations  
 191 with phase coherence and the associated dFC states with dictionary learning. dFC state modules were obtained using  
 192 the Louvain modularity algorithm. The covariance components (CCs) associated with these spatial priors were then  
 193 included in several inversion algorithms, whose reconstruction quality was assessed by the free energy and variance  
 194 explained of the associated models, and by the overlap of EEG source components (obtained through spatial ICA  
 195 applied to the source reconstructed EEG) with ROIs and RSN templates.

196 *fsl\_motion\_outliers*, whereby the DVARS metric proposed in (Power et al., 2012) is first computed, and  
 197 then thresholded at the 75<sup>th</sup> percentile plus 1.5 times the inter-quartile range. Finally, a high-pass temporal

198 filtering with a cut-off period of 100 s was applied, and spatial smoothing using a Gaussian kernel with full  
199 width at half-maximum (FWHM) of 3 mm was performed.

200 For each subject, WM and CSF masks were obtained from the respective  $T_1$ -weighted structural  
201 image by segmentation into gray matter, WM and CSF using FSL tool FAST (Zhang et al., 2001). The  
202 functional images were co-registered with the respective  $T_1$ -weighted structural images using FSL tool  
203 FLIRT, and subsequently with the Montreal Neurological Institute (MNI) (Collins et al., 1994) template,  
204 using FSL tool FNIRT (Jenkinson et al., 2002; Jenkinson and Smith, 2001). Both WM and CSF masks were  
205 transformed into functional space and were then eroded using a 3 mm spherical kernel in order to minimize  
206 partial volume effects (Jo et al., 2010). Additionally, the eroded CSF mask was intersected with a mask of  
207 the large ventricles from the MNI space, following the rationale described in (Chang and Glover, 2009).

208 Each participant's structural image was parceled into  $N = 90$  non-overlapping regions of the  
209 cerebrum according to the automated anatomical labeling (AAL) atlas (Tzourio-Mazoyer et al., 2002).  
210 These parcels were co-registered to the participant's functional space, and the pre-processed BOLD data  
211 were then averaged within each parcel.

## 212 **2.4.2 fMRI priors for EEG source reconstruction**

213 From the pre-processed fMRI data, several potential priors for EEG source reconstruction were  
214 subsequently extracted (procedures described next), namely: resting-state networks for all runs, and task-  
215 related activity maps and dynamic functional connectivity (dFC) states for the task runs only.

### 216 **Identification of resting-state networks**

217 The pre-processed fMRI data were submitted to a group-level probabilistic spatial ICA (sICA)  
218 decomposition using the FSL tool MELODIC (Beckmann and Smith, 2004), whereby the data of each run  
219 for all participants is temporally concatenated prior to the sICA step, as recommended in the MELODIC's  
220 guide for the identification of RSNs (<https://fsl.fmrib.ox.ac.uk/fsl/fslwiki/MELODIC>). The optimal number

221 of independent components (ICs) was automatically estimated based on the eigenspectrum of its covariance  
222 matrix (Beckmann and Smith, 2004), with an average of approximately 40 ICs across runs.

223 An automatic procedure for the identification of well-known RSNs was then applied, in which the  
224 spatial maps of the ICs (thresholded at  $Z = 3.0$ ) were compared with those of the 10 RSN templates described  
225 in (Smith et al., 2009), in terms of spatial overlap computed as the Dice coefficient (Dice, 1945). For each  
226 template, the IC map yielding the highest Dice coefficient was determined as the corresponding RSN. In  
227 the cases of non-mutually exclusive assignments, the optimal assignment was determined by randomizing  
228 the order of the RSN templates (a maximum of 10000 possible combinations were considered, for  
229 computational purposes), and then sequentially, and mutually exclusively, assigning them to the IC maps  
230 based on their Dice coefficient. The assignment with the highest average Dice coefficient across all RSN  
231 templates was then deemed optimal, yielding the final set of RSNs: three visual networks (RSN 1-3), the  
232 default mode network (DMN, RSN4), a cerebellum network (RSN5), a motor network (RSN6), an auditory  
233 network (RSN7), the salience network (RSN8), a right language network (RSN9) and a left language  
234 network (RSN10).

235 These 10 RSNs were then used as spatial priors for the reconstruction of sources of EEG collected  
236 on all four runs. RSNs were considered in the task runs because these have been shown to be also present  
237 in task-based studies (Cole et al., 2016; Di et al., 2013).

### 238 **hMT+ and BM-related activity mapping**

239 For the purpose of mapping hMT+/V5 from the localizer run, and the regions involved in the BM  
240 perception task from the other two runs, a general linear model (GLM) framework was used. For the  
241 localizer, two regressors representing the periods showing dots (stationary and moving) were considered.  
242 These regressors were built based on unit boxcar functions with ones during the respective periods, and  
243 zeros elsewhere. Similarly, three regressors representing the *body*, *foot* and *random* blocks of the BM runs  
244 were built for analyzing the BM runs, with the regressors also based on unit boxcar functions. All regressors  
245 were convolved with a canonical, double-gamma hemodynamic response function (HRF). The run-specific,

246 HRF-convolved regressors were then included in a GLM that was subsequently fitted to the associated fMRI  
247 data using FSL tool FILM (Woolrich et al., 2001). The hMT+/V5 regions were identified from the localizer  
248 run by contrasting the moving and the stationary dots periods, whereas the areas associated with BM  
249 perception were mapped according to the following contrasts: *body – random*, *foot – random*, and *body –*  
250 *foot*. Voxels exhibiting significant changes within these contrasts were identified by cluster thresholding  
251 (voxel  $Z > 2.5$ , cluster  $p < 0.05$ ).

252 In this way, a single spatial prior is obtained for reconstructing the sources of the EEG collected  
253 during the localizer run. In contrast, three spatial priors (one for each contrast) are made available for each  
254 of the two BM runs.

## 255 **Dynamic functional connectivity analysis**

256 The dFC analysis described here was only performed on the fMRI data collected during the task  
257 runs (localizer and two BM runs), since its purpose was to objectively identify a small set of dFC states  
258 associated with the tasks, and to use them as spatial priors in the subsequent reconstruction of EEG sources.  
259 The dFC was estimated using the phase coherence (PC) method, which allows to compute the dFC for each  
260 fMRI sample; the loss in temporal resolution and the ambiguous selection of a window size, both inevitable  
261 in conventional sliding-window correlation approaches (Prete et al., 2017), are thus avoided (Glerean et al.,  
262 2012). For the PC method, a second-order Butterworth band-pass filter in the range of 0.01–0.1 Hz was first  
263 applied to the parcel-averaged BOLD signals. The instantaneous phase,  $\theta$ , of the filtered signal,  $n$ , was then  
264 estimated using the Hilbert transform (Cabral et al., 2017; Figueroa et al., 2019). For each participant, the  
265 dFC matrix  $\mathbf{C} \in \mathbb{R}^{N \times N \times T}$  ( $N = 90$  brain regions from the AAL atlas, and  $T$  is the number of fMRI samples,  
266 which depends on the run under analysis) was computed for each pair of parcels,  $n$  and  $p$ , and at each fMRI  
267 sample  $t$ , using the equation:

$$\mathbf{C}(n, p, t) = \cos(\theta(n, t) - \theta(p, t)) \quad (1)$$

268 For each run and participant individually, the matrix  $\mathbf{C}$  was then submitted to the leading  
269 eigenvector dynamics analysis (LEiDA) (Cabral et al., 2017; Figueroa et al., 2019; Lord et al., 2019), with  
270 the purpose of reducing the dimension of each temporal entry of  $\mathbf{C}$  ( $N \times N$ ) by only considering the associated  
271 leading eigenvector (of dimension  $N$ ), while nonetheless explaining most of the variance ( $> 50\%$  in all cases,  
272 and up to 90%) (Lord et al., 2019). This step yielded the reduced dFC matrix  $\mathbf{C}_R \in \mathbb{R}^{N \times T}$ , with the columns  
273  $\mathbf{c}_t \in \mathbb{R}^{N \times 1}$  ( $t = 1, \dots, T$ ) representing the leading eigenvectors, and the rows indicating the parcels. Each  
274 eigenvector is composed by elements with positive and/or negative signs; if all positive, a global mode is  
275 governing the parcel-averaged BOLD signals where all the associated phases point in the same direction  
276 with respect to the orientation defined by the eigenvector (Figueroa et al., 2019). If the elements of the  
277 eigenvector have different signs, the parcels can be grouped into two networks according to their sign  
278 (positive or negative) in the eigenvector. The magnitude of the elements indicates how strongly the  
279 associated parcel belongs to its assigned network (Newman, 2006).

280 For the identification of dFC states, an  $l_1$ -norm regularized dictionary learning (DL) approach was  
281 employed, following the methodology proposed in (Abreu et al., 2019). Briefly, this can be formulated as  
282 the matrix factorization problem  $\mathbf{C}_R = \mathbf{D}\mathbf{A}$ , where  $\mathbf{D} = [\mathbf{d}_1, \dots, \mathbf{d}_k] \in \mathbb{R}^{N \times k}$  and  $\mathbf{A} = [\mathbf{a}_1, \dots, \mathbf{a}_T] \in \mathbb{R}^{k \times T}$   
283 represent the dFC states and associated weight time-courses (i.e. contribution of each dFC state to  
284 reconstruct  $\mathbf{C}_R$  at each time point), respectively; and  $k$  is the number of dFC states. These are estimated by  
285 solving the optimization problem given by:

$$\arg \min_{\mathbf{D}, \mathbf{A}} \|\mathbf{C} - \mathbf{D}\mathbf{A}\|_F^2 \quad (2)$$

286 so that the reconstruction error of  $\mathbf{C}_R$ ,  $E = \|\mathbf{C}_R - \mathbf{D}\mathbf{A}\|_F^2$ , is minimized;  $\|\cdot\|_F$  denotes the Frobenius norm  
287 of a matrix. The estimation of  $\mathbf{D}$  and  $\mathbf{A}$  was performed using the algorithms implemented in the MATLAB®  
288 toolbox SParse Modeling Software (SPAMS, Mairal et al., 2010). The sparsity of the solutions was  
289 controlled by a non-negative parameter  $\lambda$  on an  $l_1$ -norm regularization framework. The number of dFC states  
290  $k$  was varied between from 5 to 10 in unit steps, and  $\lambda$  between ten values from 1 to 0.1259 in decreasing  
291 exponential steps.

292 The optimal  $k$  and  $\lambda$  values were jointly determined with the dFC states to be considered as spatial  
293 priors in the EEG source reconstruction. This was achieved by first computing the Pearson correlation  
294 between the contrasts defined for identifying the activation maps (one for the localizer run, and three for  
295 the BM runs) and the dFC weight time-courses in  $\mathbf{A}$ , for all possible combinations of  $k$  and  $\lambda$ . For the  
296 localizer run, the dFC state exhibiting the highest correlation across dFC states, and combinations of  $k$  and  
297  $\lambda$ , was deemed as task-related. For the BM runs, the dFC state exhibiting the highest correlation across  
298 contrasts, dFC states and combinations of  $k$  and  $\lambda$  was first identified. For the optimal combination of  $k$  and  
299  $\lambda$ , the most correlated dFC states associated with the remaining contrasts were then determined. In cases  
300 where multiple contrasts were associated with the same dFC state, only that state was considered for the  
301 subsequent analyses.

302 The dFC states of interest were then finally submitted to a modularity analysis, with the purpose of  
303 identifying modular (or community) structure in those states. Because the dFC states are column vectors,  
304 rather than square matrices representing a connectivity matrix as required for the modularity analysis, such  
305 connectivity matrix of a given dFC state  $\mathbf{d}_i \in \mathbb{R}^{N \times 1}$  was first reconstructed by computing the outer product  
306 of the dFC state,  $\mathbf{d}_i \mathbf{d}_i^T \in \mathbb{R}^{N \times N}$  (Cabral et al., 2017). The Louvain algorithm as implemented in the Brain  
307 Connectivity Toolbox was then applied to the reconstructed connectivity matrices of the dFC states of  
308 interest (Rubinov and Sporns, 2010). This algorithm considers both the positive and negative weights of the  
309 unthresholded connectivity matrix, thus avoiding the ambiguous selection of a threshold as required in  
310 conventional modularity algorithms. Each of the  $N$  parcels is then assigned a label indicating which module  
311 the parcel belongs to. The network modules were then projected into binary 3D spatial maps to be used as  
312 spatial priors in the EEG source reconstruction, by identifying the voxels belonging to parcels (according  
313 to the AAL atlas used for parcelling the brain) assigned to the same modules. The number of modules  
314 automatically identified by the Louvain algorithm was between 2 and 4 in all cases; in this way, the number  
315 of spatial priors built from this analysis varied according to the number of contrasts (run) and modules  
316 identified, with a maximum of 1 [contrast]  $\times$  4 [modules] = 4 for the localizer run, and 3 [contrasts]  $\times$  4  
317 [modules] = 12 for the BM runs.

## 318 **2.5 EEG data analysis**

### 319 **2.5.1 Pre-processing**

320 EEG data underwent gradient artifact correction on a volume-wise basis using a standard artifact  
321 template subtraction (AAS) approach (Allen et al., 2000) using the FMRIB tools implemented as a plug-in  
322 of the EEGLAB toolbox (Delorme and Makeig, 2004). The pulse artifact was removed using the method  
323 presented in (Abreu et al., 2016), whereby the EEG data is first decomposed using independent component  
324 analysis (ICA), followed by AAS to remove the artifact occurrences from the independent components (ICs)  
325 associated with the artifact. The corrected EEG data is then obtained by reconstructing the signal using the  
326 artifact-corrected ICs together with the original non-artifact-related ICs.

327 After the removal of the MR-induced artifacts, EEG data was then submitted to some of the routines  
328 of the automatic pipeline (APP) for EEG pre-processing described in (da Cruz et al., 2018), namely: 1) re-  
329 referencing to a robust estimate of the mean of all channels; 2) removal and interpolation of bad channels;  
330 and 3) removal of bad epochs of 1 second (matching the TR of the fMRI data). An additional ICA step was  
331 then performed with the purpose of removing additional sources of EEG artifacts; these were identified  
332 using the ICLabel algorithm (Pion-Tonachini et al., 2019), implemented as a plug-in of the EEGLAB  
333 toolbox (Delorme and Makeig, 2004). The classification provided by ICLabel is based on a previously  
334 trained model with a large EEG dataset collected outside the MR scanner, rendering this algorithm sub-  
335 optimal for our dataset. To cope with this, all ICs were visually inspected in order to validate, and eventually  
336 correct (for both false positives and negatives), the classification outputs of ICLabel. Finally, the EEG data  
337 was down-sampled to 500 Hz and band-pass filtered to 1–30 Hz.

### 338 **2.5.2 Source reconstruction**

339 The pre-processed EEG data from all runs was then submitted to several EEG source reconstruction  
340 procedures implemented in SPM12 (<https://www.fil.ion.ucl.ac.uk/spm/>). To reduce the computational load,



341 the EEG data was further downsampled to a sampling rate of 60 Hz, two times the highest frequency  
342 component of the data.

### 343 **The forward problem**

344 A realistic head model was built by first segmenting each participant's structural image into 3 tissue  
345 labels (brain, scalp and skull), and computing the deformation field needed to co-register the structural  
346 images into an MNI template. The individual meshes were then obtained by applying the inverse of this  
347 deformation field to the canonical meshes derived from the MNI template; meshes with 8196 vertices were  
348 considered. The electrode positions were co-registered to the scalp compartment by first considering their  
349 standard positions (in the 10/10 coordinate system), and then manually adjusting them to match the  
350 distortions clearly observed on the structural images. A realistically shaped volume conduction model was  
351 estimated using a boundary element model (BEM) with 3 layers (scalp, inner skull and outer skull). 8196  
352 source dipoles were placed at the vertices of a cortical surface also derived from the MNI template and  
353 transformed into the structural image. The leadfield matrix was then estimated, mapping each possible  
354 dipole configuration onto a scalp potential distribution.

### 355 **The inverse problem**

356 The inverse problem was solved using a Parametric Empirical Bayesian (PEB) framework as  
357 implemented in SPM12, which can be formulated as (López et al., 2014):

$$\begin{aligned} \mathbf{Y} &= \mathbf{L} \cdot \mathbf{S} + \boldsymbol{\varepsilon}_1, \quad \boldsymbol{\varepsilon}_1 \sim \mathcal{N}(0, \mathbf{T}, \mathbf{C}_C) \\ \mathbf{S} &= \mathbf{0} + \boldsymbol{\varepsilon}_2, \quad \boldsymbol{\varepsilon}_2 \sim \mathcal{N}(0, \mathbf{T}, \mathbf{C}_D) \end{aligned} \tag{3}$$

358 where  $\mathbf{Y} \in \mathbb{R}^{C \times T}$  is the EEG data with  $C$  channels (64 in this case) and  $T$  time samples (depends on the run  
359 under analysis);  $\mathbf{L} \in \mathbb{R}^{C \times D}$  is the leadfield matrix ( $D$  is the number of dipoles, 8196 in this case); and  
360  $\mathbf{S} \in \mathbb{R}^{D \times T}$  is the unknown source dynamics at each dipole.  $\mathcal{N}(\cdot)$  represents the multivariate Gaussian  
361 probability distribution, and  $\mathbf{T}$  the known and fixed temporal correlations. The terms  $\boldsymbol{\varepsilon}_1$  and  $\boldsymbol{\varepsilon}_2$  denote  
362 the noise at the channel and source spaces, with covariance matrices  $\mathbf{C}_C \in \mathbb{R}^{C \times C}$  and  $\mathbf{C}_D \in \mathbb{R}^{D \times D}$ ,

363 respectively. Channel noise is typically assumed to be uniform across channels, and therefore can be defined  
364 as  $\mathbf{C}_C = h_C \mathbf{I}_C$ , with  $h_C$  the channel noise variance and  $\mathbf{I}_C \in \mathbb{R}^{C \times C}$  the identity matrix. The source space  
365 covariance matrix  $\mathbf{C}_D$  assumes the form:

$$\mathbf{C}_D = \sum_{p=1}^P \gamma_p \mathbf{V}_p \quad (4)$$

366 where  $\mathbf{V}_p \in \mathbb{R}^{D \times D}$  represents different types of covariance components (CCs) reflecting prior knowledge  
367 on the sources to be reconstructed, and  $\gamma_p$  the unknown hyperparameter denoting its relative importance.  
368 These hyperparameters work as regularization parameters in ill-posed problems such as the EEG inverse  
369 problem, and were estimated using a restricted maximum likelihood (ReML) algorithm that uses as cost  
370 function the free-energy of the model. Commonly used source inversion algorithms can then be derived  
371 from Eq. 3 by defining the CCs that appropriately reflect their assumptions. For instance, MN solutions  
372 assume that all dipoles have the same variance and no covariance; therefore, only one CC is defined as  
373  $\mathbf{V}_1 = h_D \mathbf{I}_D$ , with  $h_D$  the source noise variance and  $\mathbf{I}_D \in \mathbb{R}^{D \times D}$  the identity matrix.

374 In this work, we tested four source inversion algorithms: MN, LORETA, EBB and MSP; their  
375 derivations from Eq. 3 and associated CCs are thoroughly presented in (López et al., 2014). Additionally to  
376 those specific to a given algorithm, other CCs estimated from the fMRI-derived spatial priors (RSNs,  
377 activation maps and task-based dFC states) were considered (the procedures for their estimation are briefly  
378 described below). Specifically, all four inversion algorithms were tested using three different sets of CCs:  
379 the simplest set  $S_1$ , with only CCs specific to the algorithm; 2) a larger set  $S_2$  comprising  $S_1$  and CCs from  
380 RSNs and activation maps (the latter for task runs only); and 3) the largest set  $S_3$  comprising  $S_2$  and CCs  
381 from the modules of the task-related dFC states (hence only tested on EEG collected from task runs). A  
382 total of 4 [inversion algorithms]  $\times$  3 [sets of CCs] = 12 reconstructions of EEG sources  $\mathbf{S}$  were then  
383 performed for each subject and run (only 8 for the resting-state runs).

## 384 Estimation of covariance components from fMRI-derived spatial priors

385 CCs were estimated from the fMRI-derived spatial priors by first transforming them into binary  
386 priors. These 3D binary spatial priors were then projected onto the 2D cortical surface using nearest-  
387 neighbor interpolation (Henson et al., 2010), and smoothed using the Green's function  $\mathbf{G}$  of the cortical  
388 mesh adjacency matrix  $\mathbf{M} \in \mathbb{R}^{D \times D}$ ,  $\mathbf{G} = \sigma \mathbf{M}$  (Harrison et al., 2007). The entries of  $\mathbf{M}$ ,  $m_{ij}$ , are 1 if vertices  
389  $i$  and  $j$  of the cortical surface are neighbors (within a defined radius) and 0 otherwise; here, a radius of 8  
390 vertices and a smoothing parameter of  $\sigma = 0.6$  were selected according to (Friston et al., 2008). The CCs  
391 of the smoothed (and projected) spatial priors are then obtained by computing their covariance matrices,  
392 i.e., their outer product. These procedures are illustrated in Fig. 2.

## 393 2.6 Source reconstruction quality

### 394 2.6.1 EEG source components

395 Following the rationale of previous studies (Abreu et al., 2020b; Liu et al., 2018, 2017), a spatial  
396 ICA step similar to that applied to the fMRI data for identifying RSNs was then performed on the  
397 reconstructed source dynamics  $\mathbf{S}$ , with the purpose of separating those potentially associated with RSNs  
398 and/or other regions of interest in our tasks. This can be formulated as:

$$\mathbf{S}^T = \mathbf{U} \cdot \mathbf{S}_{\text{IC}} \quad (5)$$

399 where  $\mathbf{U} \in \mathbb{R}^{T \times I}$  is the mixing matrix, with each column  $\mathbf{u}_i \in \mathbb{R}^{T \times 1}$  the time-course of the source  
400 component (SC)  $i$ ; and  $\mathbf{S}_{\text{IC}} \in \mathbb{R}^{I \times D}$  represents the spatial maps in the source space associated to each of  
401 the  $I$  SCs. Because the EEG data is submitted to a temporal reduction step prior to solving the inverse  
402 problem in order to reduce noise while guaranteeing a temporally continuous estimation of sources (López  
403 et al., 2014), the rank of  $\mathbf{S}$  is reduced accordingly, being then defined an upper bound on the number of SCs

404 to be estimated. Such maximum allowed number of SCs was then estimated, which was between 50 and 60

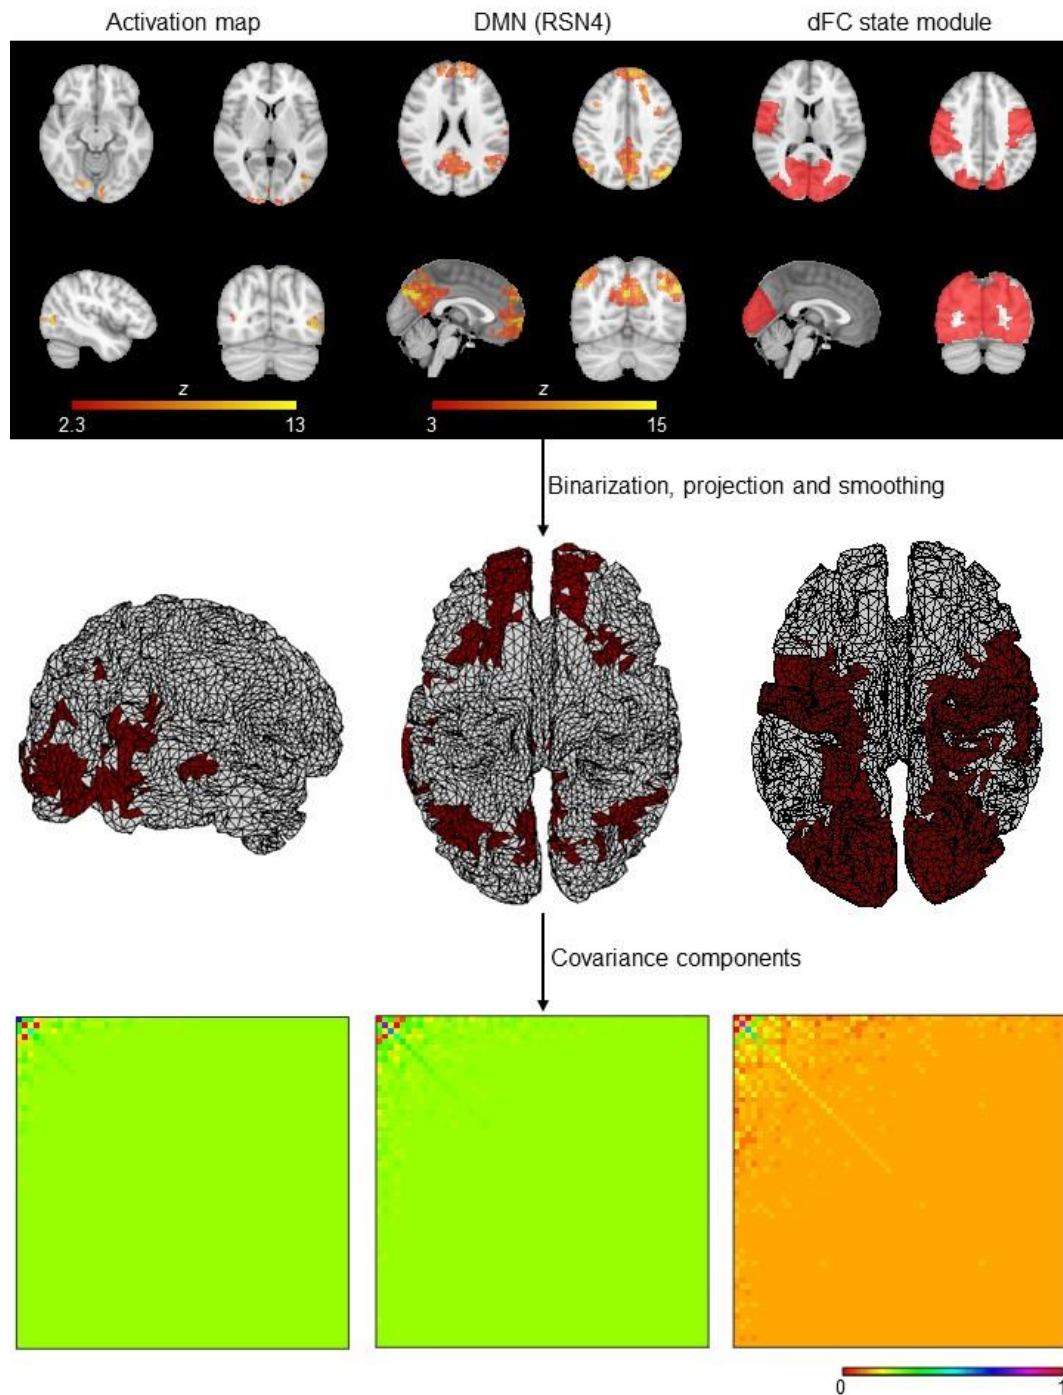

406

407 **Figure 2:** Deriving covariance components (CCs) from fMRI spatial priors. The 3D fMRI spatial priors are first  
408 binarized, projected onto the 2D cortical surface using nearest-neighbor interpolation and smoothed using the Green's  
409 function. The associated CCs are then obtained by computing the outer product. For visualization purposes, the  
410 temporally reduced CCs are illustrated, by applying the same temporal projector considered when reducing the EEG  
data prior to its reconstruction.

411 in all cases. Finally, the SCs were converted into  $z$ -scores, and the deformation field estimated while solving  
412 the forward problem was applied to transform them from the source space into the MNI space.

## 413 **2.6.2 Quality metrics**

414 Besides the free-energy (FE) of the inversion model and the variance explained (VE) of the  
415 reconstructed EEG data  $\tilde{\mathbf{Y}} = \mathbf{L} \cdot \mathbf{S}$  relative to the actual EEG data  $\mathbf{Y}$  (see Eq. 3), other quality metrics  
416 reflecting more directly the presence of neuronal activity of interest in the SCs were considered.

417 First, because the perception of motion in general, and of biological motion in particular, is known  
418 to elicit certain brain regions, the following four spherical regions of interest (ROIs) of 10 mm centered at  
419 specific MNI coordinates (indicated in square brackets) were considered (Chang et al., 2018): anterior insula  
420 (aINS) at [ $\pm 36, 24, 2$ ], extrastriate body area (EBA) at [left  $-46, -75, -4$ ; right  $47, -71, -4$ ], fusiform body  
421 area (FBA) at [left  $-38, -38, -27$ ; right  $43, -43, -28$ ], and fusiform gyrus (FFG) at [ $\pm 42, -56, -14$ ]. Four  
422 additional task-related brain regions were obtained from FSL atlases (threshold applied to the probability  
423 maps is indicated in square brackets), namely (Chang et al., 2018): inferior frontal gyrus (IFG) [0.25],  
424 posterior superior temporal sulcus (pSTS) [0.25], visual area V3 [0.25] and visual area hMT+/V5 [0.10].  
425 After binarizing the ROIs and the SC maps, the Dice coefficient  $d$ , and the proportion of the ROIs contained  
426 in the SC maps  $p_{RS}$ , were then quantified according to (Dice, 1945):

$$d = \frac{2 \times N_{ov}}{N_{ROI} + N_{SC}} \quad \text{and} \quad p_{RS} = \frac{N_{ov}}{N_{ROI}} \quad (6)$$

427 where  $N_{ROI}$  and  $N_{SC}$  denote the number of non-zero voxels in the ROIs and SC maps, respectively, and  $N_{ov}$   
428 the number of overlapping non-zero voxels between the two images; both measures range from 0 (no  
429 overlap) to 1. These same two measures,  $d$  and  $p_{RS}$ , were also computed between the SC maps and 10 RSN  
430 templates described in (Smith et al., 2009), in order to assess which, if any, SCs represented RSNs (similar  
431 to the identification of RSNs on fMRI data described previously).

432 All these measures were computed for each subject, run, inversion algorithm, set of covariance  
433 components (CCs), SC maps and maps of interest (8 ROIs and 10 RSN templates). Because only a subset

434 of the SC maps is expected to be associated with those maps of interest, the SC map yielding the highest  
435 dice coefficient for each map was identified, and the associated  $d^*$  and  $p_{RS}^*$  maximum values kept for  
436 subsequent analyses. The  $d^*$  and  $p_{RS}^*$  values were further summarized by computing their average within  
437 each map type (ROIs and RSN templates), thus yielding the final set of 13 [subjects]  $\times$  4 [runs]  $\times$  4  
438 [inversions]  $\times$  3 [sets of CCs]  $\times$  2 [map types] = 1440 values of  $d^*$  and  $p_{RS}^*$ .

### 439 **2.6.3 Statistical analysis**

440 The main effects of the population group (MS patients and healthy subjects), inversion algorithm,  
441 the set of CCs and the type of map of interest, as well as interaction effects, were evaluated by means of a  
442 4-way repeated measures Analysis of Variance (ANOVA) for the FE, VE,  $d^*$  and  $p_{RS}^*$  measures treated  
443 separately as the dependent variables. Multiple comparisons between the inversion algorithms, sets of CCs  
444 and interactions between the two were performed by means of a post-hoc statistical test with the Tukey-  
445 Kramer correction. A level of statistical significance  $p < 0.05$  was considered.

## 446 **3 Results**

447 In this work, the quality of EEG source reconstruction provided by the different combinations of  
448 (four) inversion algorithms and (three) sets of CCs, was first evaluated in terms of the FE and VE of the  
449 associated models, which are commonly considered in PEB frameworks. Because no significant differences  
450 were observed between population groups (healthy subjects and MS patients) the FE and VE values shown  
451 in Table 1 were averaged across participants; the values associated with the three visual perception task  
452 runs (hMT+/V5 functional localizer and two BM runs) were also averaged. The combination MSP+S<sub>1</sub> (with  
453 S<sub>1</sub> containing only CCs specifically associated with the inversion algorithm) yielded the lowest FE (the  
454 lower, the better) and the highest VE, only followed by LORETA+S<sub>2</sub> and LORETA+S<sub>3</sub>. The ANOVA of  
455 the FE and VE values revealed significant main effects of the inversion algorithms and sets of CCs, as well

456 as a significant interaction. The post-hoc tests on both FE and VE values showed no statistically significant  
 457 differences between inversion algorithms, and

| Sets of CCs    | Inversion algorithms | Task runs (Localizer+BM)  |                  | Resting-state runs        |                  |
|----------------|----------------------|---------------------------|------------------|---------------------------|------------------|
|                |                      | FE×10 <sup>4</sup> (±std) | VE [%] (±std)    | FE×10 <sup>4</sup> (±std) | VE [%] (±std)    |
| S <sub>1</sub> | MN                   | 1.14±0.10                 | 79.7±14.6        | 1.10±0.15                 | 84.1±11.2        |
|                | LORETA               | 1.13±0.10                 | 79.5±14.5        | 1.10±0.15                 | 83.9±11.3        |
|                | EBB                  | 1.13±0.11                 | 79.4±14.6        | 1.09±0.15                 | 83.2±11.8        |
|                | MSP                  | <b>1.10±0.11</b>          | <b>84.5±10.5</b> | <b>1.06±0.15</b>          | <b>87.6±8.3</b>  |
| S <sub>2</sub> | MN                   | 1.13±0.11                 | 81.8±13.7        | 1.09±0.15                 | <b>85.6±10.6</b> |
|                | LORETA               | <b>1.12±0.11</b>          | <b>81.9±13.7</b> | <b>1.09±0.15</b>          | 85.5±10.6        |
|                | EBB                  | 1.13±0.11                 | 79.4±14.7        | 1.09±0.15                 | 83.2±11.8        |
|                | MSP                  | 1.15±0.11                 | 63.9±20.4        | 1.10±0.16                 | 74.9±19.5        |
| S <sub>3</sub> | MN                   | 1.12±0.12                 | 80.7±13.7        | NA                        | NA               |
|                | LORETA               | <b>1.12±0.12</b>          | <b>80.7±13.7</b> | NA                        | NA               |
|                | EBB                  | 1.13±0.12                 | 78.2±14.8        | NA                        | NA               |
|                | MSP                  | 1.16±0.12                 | 60.3±15.5        | NA                        | NA               |

458 **Table 1:** Average FE and VE values across participants, and across three visual perception task runs, for all  
 459 combinations of inversion algorithms and sets of covariance components. Values in bold represent the best across  
 460 inversion algorithms for each CC set, and values in red represent the overall best (across inversion algorithms and CC  
 461 sets).

462 the set S<sub>1</sub> was significantly better than the sets S<sub>2</sub> and S<sub>3</sub>; as expected, the combination MSP+S<sub>1</sub> performed  
 463 significantly better than other five combinations using the MN or EBB as inversion algorithms, and sets S<sub>2</sub>  
 464 or S<sub>3</sub>.

465 In order to directly reflect the presence of neuronal activity of interest in the SCs, the source  
 466 reconstruction quality was then quantified in terms of the overlap of SCs with the 8 ROIs and the 10 RSN  
 467 templates. This is illustrated in Fig. 3, showing a considerable overlap (in terms of  $d^*$  and  $p_{RS}^*$ ) of two  
 468 SCs with the EBA mask and the visual RSN1 template, for the first BM run of a given healthy subject.  
 469 Consistently with the FE and VE values, the  $d^*$  and  $p_{RS}^*$  values were not statistically significantly  
 470 different between population groups, and thus were averaged across participants and across task runs; these  
 471 are depicted in Table 2. When considering only the CCs specific to the inversion algorithms (set S<sub>1</sub>), EBB  
 472 yields the best results in all cases, and is the overall best (across sets of CCs) in terms of  $p_{RS}^*$  for the resting-  
 473 state run. However, by combining S<sub>1</sub> with RSNs and activation maps (set S<sub>2</sub>), MN achieves the highest  $d^*$   
 474 and  $p_{RS}^*$  values for both types of runs, and the overall highest values (across sets of CCs) in terms of  $d^*$



475 for the resting-state run. For the task runs, the largest set of CCs including the dFC state modules (set  $S_3$ )  
476 exhibits the overall best source reconstruction. Similarly to the statistical analysis of FE and VE, the  
477 ANOVA of the  $d^*$  and  $p_{RS}^*$  values revealed significant main effects of the inversion algorithms and sets

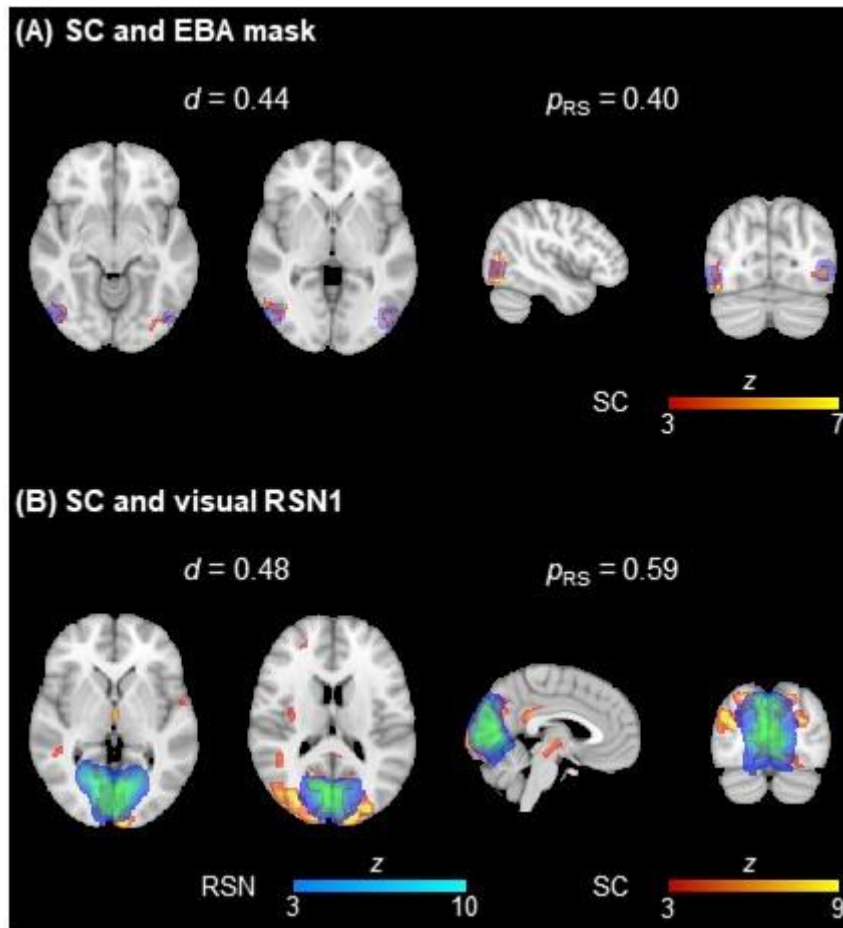

478

479 **Figure 3:** Illustration of the overlap between two EEG SCs (in red-yellow) and (A) the EBA mask (in blue) and (B) a  
480 visual RSN (in blue-light blue) from (Smith et al., 2009). The dice coefficient  $d$  and the proportion of the ROIs  
481 contained in the respective SCs are also depicted.

482 of CCs, as well as a significant interaction. For the  $d^*$  values, the post-hoc statistical tests showed that MN  
483 and EBB inversion algorithms performed significantly better than LORETA and MSP, and that using the  
484 sets  $S_2$  or  $S_3$  was significantly better than only considering the set  $S_1$ . The latter observation was also true  
485 for the  $p_{RS}^*$  values, although in this case it was the MN and MSP inversion algorithms that yielded  
486 significantly better results than LORETA and EBB. The combinations EBB+ $S_2$  and MSP+ $S_3$  exhibited



487 significantly higher  $d^*$  and  $p_{RS}^*$  values, respectively, than a subset of combinations including the MN and  
 488 LORETA algorithms, and the set  $S_1$ .

| Sets of CCs | Inversion algorithms | Task runs (Localizer+BM)        |                                 | Resting-state runs              |                                 |
|-------------|----------------------|---------------------------------|---------------------------------|---------------------------------|---------------------------------|
|             |                      | $d^*$ ( $\pm$ std)              | $p_{RS}^*$ ( $\pm$ std)         | $d^*$ ( $\pm$ std)              | $p_{RS}^*$ ( $\pm$ std)         |
| $S_1$       | <i>MN</i>            | 0.15 $\pm$ 0.05                 | 0.22 $\pm$ 0.10                 | 0.15 $\pm$ 0.05                 | 0.22 $\pm$ 0.10                 |
|             | <i>LORETA</i>        | 0.12 $\pm$ 0.05                 | 0.14 $\pm$ 0.07                 | 0.12 $\pm$ 0.04                 | 0.15 $\pm$ 0.06                 |
|             | <i>EBB</i>           | <b>0.15<math>\pm</math>0.05</b> | <b>0.24<math>\pm</math>0.11</b> | <b>0.16<math>\pm</math>0.06</b> | <b>0.25<math>\pm</math>0.11</b> |
|             | <i>MSP</i>           | 0.14 $\pm$ 0.05                 | 0.18 $\pm$ 0.09                 | 0.12 $\pm$ 0.04                 | 0.16 $\pm$ 0.09                 |
| $S_2$       | <i>MN</i>            | <b>0.15<math>\pm</math>0.05</b> | <b>0.24<math>\pm</math>0.12</b> | <b>0.16<math>\pm</math>0.05</b> | <b>0.24<math>\pm</math>0.11</b> |
|             | <i>LORETA</i>        | 0.15 $\pm$ 0.05                 | 0.23 $\pm$ 0.12                 | 0.15 $\pm$ 0.04                 | 0.22 $\pm$ 0.12                 |
|             | <i>EBB</i>           | 0.15 $\pm$ 0.05                 | 0.21 $\pm$ 0.10                 | 0.15 $\pm$ 0.05                 | 0.23 $\pm$ 0.11                 |
|             | <i>MSP</i>           | 0.14 $\pm$ 0.05                 | 0.23 $\pm$ 0.11                 | 0.14 $\pm$ 0.05                 | 0.22 $\pm$ 0.09                 |
| $S_3$       | <i>MN</i>            | 0.15 $\pm$ 0.05                 | 0.24 $\pm$ 0.12                 | NA                              | NA                              |
|             | <i>LORETA</i>        | <b>0.16<math>\pm</math>0.05</b> | 0.24 $\pm$ 0.12                 | NA                              | NA                              |
|             | <i>EBB</i>           | 0.15 $\pm$ 0.05                 | 0.23 $\pm$ 0.11                 | NA                              | NA                              |
|             | <i>MSP</i>           | 0.12 $\pm$ 0.07                 | <b>0.35<math>\pm</math>0.10</b> | NA                              | NA                              |

489 **Table 2:** Average  $d^*$  and  $p_{RS}^*$  values across participants, and across three visual perception task runs, for all  
 490 combinations of inversion algorithms and sets of covariance components. Values in bold represent the best across  
 491 inversion algorithms for each CC set, and values in red represent the overall best (across inversion algorithms and CC  
 492 sets).

## 493 4 Discussion

494 In this work, we aimed at optimizing the reconstruction of EEG sources by considering spatial  
 495 priors derived from concurrently acquired fMRI data when solving the inverse problem, coupled with a  
 496 systematic comparison of different inversion algorithms and sets of covariance components (CCs) reflecting  
 497 those spatial priors, on a parametric empirical Bayesian (PEB) framework. The quality of the source  
 498 reconstructions was quantified in terms of PEB-based metrics (the free-energy, FE; and the variance  
 499 explained of the respective inversion models, VE), and physiologically-based metrics (the overlap of EEG  
 500 source components with ROIs and RSN templates representative of brain activity of interest), the latter  
 501 directly reflecting the presence of neuronal activity.

### 502 EEG source reconstruction quality

503 Under a PEB framework, four inversion algorithms were tested here (MN, LORETA, EBB and  
 504 MSP) for reconstructing sources from real EEG data collected from participants performing visual

505 perception tasks and during rest, and considering three different sets of CCs. We found that depending on  
506 the type of quality metric (PEB- or physiologically-based), different conclusions could be taken. In terms  
507 of the PEB-based metrics (FE and VE), using the set consisting only of CCs specific to the inversion  
508 algorithms ( $S_1$ ) always yielded significantly better results than the CC sets including fMRI spatial priors ( $S_2$   
509 and  $S_3$ , comprising activation maps and RSNs, with or without dFC state modules, respectively). In contrast,  
510 by considering  $S_2$  and  $S_3$ , the overlap of EEG source components (SCs) with the ROIs and RSN templates  
511 (measured by the dice coefficient  $d$ , and the proportion of the ROIs/RSNs contained in the SC maps,  $p_{RS}$ )  
512 significantly surpassed that of  $S_1$ . On the one hand, these contrasting results evidence the underlying  
513 optimization procedure used here, combining the PEB framework with the restricted maximum likelihood  
514 (ReML) algorithm for estimating the hyperparameters associated with each CC (Henson et al., 2010;  
515 Phillips et al., 2005). In fact, adding fMRI spatial priors drastically increases model complexity, which is  
516 penalized by ReML, and thus may explain the best PEB-based metrics when considering the more  
517 parsimonious inversion models (López et al., 2014). On the other hand, assessing the source reconstruction  
518 quality with metrics reflecting more directly the presence of neuronal activity of interest revealed that the  
519 information contained on the fMRI spatial priors is pivotal, suggesting that increasing model complexity in  
520 this way is needed for EEG SCs to contain such activity of interest, which is of the utmost interest for any  
521 subsequent analyses. Accordingly, the usefulness of fMRI spatial priors on EEG source reconstruction has  
522 already been shown in previous studies, with the addition of task-based activation maps (Henson et al.,  
523 2010; Lei et al., 2012, 2011, 2010) or RSNs (Lei, 2012) similar to those considered here improving the  
524 reconstructions. These however have only been compared in terms of conventional quality metrics, without  
525 taking explicitly into account the neuronal activity of interest. These observations highlight the relevance  
526 of using multiple quality metrics expressing different aspects of the reconstructed sources for more  
527 appropriately characterizing them, and consequently better informing the selection of the optimal  
528 reconstruction approach.

529         Regarding the optimal inversion algorithm, we found that no statistical differences were observed  
530 when comparing the FE and VE values, whereas MN and EBB yielded significantly higher  $d$  values than

531 LORETA and MSP; MN and MSP achieved significantly higher  $p_{RS}$  values than EBB and LORETA. In  
532 contrast with the remaining inversion algorithms, LORETA is known for its low-resolution solutions  
533 (Michel and Brunet, 2019; Michel and Murray, 2012), which may render it inappropriate for localizing  
534 sources specifically associated with the limited number of rather small brain regions known to be involved  
535 in the tasks used in this study, and thus explaining its poorest performance (Halder et al., 2019). Concordant  
536 observations have been reported on previous comparison studies on simulated data (Bradley et al., 2016;  
537 Grova et al., 2006; Halder et al., 2019; Yao and Dewald, 2005), although no differences in performance  
538 were shown between MN and LORETA on real magnetoencephalography (MEG) or high-density EEG data  
539 (Hedrich et al., 2017). Similarly to MN, MSP has also been shown to provide solutions with high resolution  
540 (measured by the focal activation, for instance; Friston et al., 2008), despite potentially failing to fully  
541 recover the spatial extent of the sources (Grova et al., 2006). The same was observed for inversion  
542 algorithms of the family of beamformers as the EBB used here, namely the dynamic imaging of coherent  
543 sources (DICS) and linearly constrained minimum variance (LCMV), exhibiting higher focal activation and  
544 lower spatial extent than those of LORETA (Halder et al., 2019). Interestingly, our post-hoc interaction  
545 analyses showed that by combining EBB with  $S_2$  or MSP with  $S_3$ , the best performance in terms of  $d$  and  
546  $p_{RS}$ , respectively, is achieved, suggesting that by coupling inversion algorithms designed for providing focal  
547 solutions with information derived from fMRI data, an optimal balance between specificity and sensitivity  
548 can be found. This recommendation is of particular relevance as it is drawn from the analysis of real EEG  
549 data (which contrasts with most studies in the literature that only focus on simulated data) that explicitly  
550 reflected the presence of neuronal activity in the reconstructed sources, rather than unspecific measures as  
551 those typically used in comparison studies.

552         Localizing in the brain the sources responsible for generating scalp EEG signals has been critical  
553 for determining the underpinnings of brain function in general, and those associated with multiple  
554 neurological disorders. Here, we compared for the first time EEG source reconstruction methods within a  
555 group of healthy subjects and MS patients, and found that the quality of the associated sources was

556 irrespective of the presence of disease. This suggests that the recommendations made here may be  
557 extrapolated to future studies, regardless of the recruited population cohort.

## 558 **Reconstructing sources from EEG data collected simultaneously with fMRI**

559 The accurate reconstruction of EEG sources is not only related with the appropriateness of the  
560 inversion models used, but also with the overall quality of the EEG signal (Liu et al., 2018). EEG data  
561 simultaneously acquired with fMRI is known to suffer from severe artifact contamination (Abreu et al.,  
562 2018), but state-of-the-art pre-processing pipelines as the one used here can now bring data quality to  
563 sufficiently high levels. Despite the potentially inevitable loss in data quality relative to EEG collected  
564 outside the MR scanner, the feasibility of reconstructing sources of EEG data acquired simultaneously with  
565 fMRI has already been demonstrated (Groening et al., 2009; Siniatchkin et al., 2010; Vulliemoz et al.,  
566 2010a, 2010b, 2009), particularly using EEG caps with a conventional spatial coverage (32 or 64 channels)  
567 as the one used in this study. Moreover, a direct relationship between EEG sources and fMRI networks has  
568 already been established first for data collected separately (Liu et al., 2017), and then validated on data  
569 collected simultaneously (Abreu et al., 2020b), supporting the feasibility of these procedures on this more  
570 challenging scenario. More importantly, analyzing EEG and fMRI data collected simultaneously is  
571 especially critical when studying spontaneous brain activity as the one associated with RSNs, for instance  
572 (Abreu et al., 2018). This further motivates the procedures performed here, and suggest that deriving spatial  
573 priors from fMRI data separately acquired from EEG data may be suboptimal, which in turn could scale  
574 down their potential for guiding the reconstruction of EEG. Future studies would need to be conducted to  
575 confirm this observation.

## 576 **Spatial priors and their relationship with EEG (sources)**

577 In agreement with previous literature, in this work we found that including fMRI task activation  
578 maps and RSNs as additional CCs in the inversion models yielded significantly better EEG source  
579 reconstructions. This observation may be easily explained by the already known relationship between EEG

580 and fMRI task activation and resting-state networks. In fact, source-reconstructed EEG data has already  
581 been used for mapping task-related fluctuations (Custo et al., 2014; Gonçalves et al., 2014), as well as for  
582 identifying RSNs (Abreu et al., 2020b; Liu et al., 2018, 2017), with recent studies showing a substantial  
583 overlap between these EEG maps and those typically obtained from fMRI data (Abreu et al., 2020b).  
584 Additionally, a relationship between fMRI RSNs and EEG has also been demonstrated in the sensor space,  
585 considering particularly the EEG rhythms extracted from the frequency domain (Goldman et al., 2002;  
586 Laufs et al., 2006; Moosmann et al., 2003; Scheeringa et al., 2008), which further supports the hypothesis  
587 that EEG carries in fact information that is also mapped with fMRI.

588 We then extended the exploration of fMRI spatial priors by also considering, for the first time,  
589 priors reflecting the fluctuations in the functional connectivity of task-related networks (dynamic functional  
590 connectivity, dFC). This was accomplished by estimating dFC fluctuations using phase coherence, followed  
591 by a dictionary learning step for finding the most recurrent dFC states, and a modularity analysis for  
592 identifying the network modules of the task-related dFC states. The rationale underlying our motivation for  
593 testing these spatial priors was based on recent literature showing that dFC fluctuations (Chang et al., 2013;  
594 Grooms et al., 2017; Korhonen et al., 2014; Omidvarnia et al., 2017; Preti et al., 2014; Tagliazucchi et al.,  
595 2012; Tagliazucchi and Laufs, 2015), and dFC states in particular (Abreu et al., 2020a; Allen et al., 2018),  
596 have distinct EEG correlates, which could also be reflected on source reconstructed EEG data. Our results  
597 evidence this because by adding the task-related dFC state modules as spatial priors, the quality of the source  
598 reconstruction further increased for the task runs, in terms of the overlap with the ROIs and RSN templates.  
599 Noteworthy, other than task-related dFC states were not considered here, because otherwise all dFC states  
600 would have to be included given the lack of criteria for selecting a subset of them, which would be necessary  
601 to control for the potentially increasing complexity of the models.

602 Importantly, spatial priors of different natures have already been suggested (Lei et al., 2015).  
603 Knowing the structural connectome by analyzing diffusion MRI (dMRI) data may inform functional  
604 connectivity measures in the EEG source space in terms of the strength of the underlying structural  
605 connections, by weighting those measures accordingly (Knösche et al., 2013). Moreover, the fiber tracking

606 between regions of interest allows to estimate the time lag between their functional connections, which is  
607 of particular interest when considering distantly located regions (Chu et al., 2015). Effective functional  
608 connectivity estimates obtained through Granger causality in the EEG source space can also be informed  
609 by connectivity priors also derived from Granger causality analyses of the fMRI data, despite its much lower  
610 temporal resolution compared to that of EEG (Roebroeck et al., 2005). Dynamic causal modeling (DCM)  
611 also estimates effective functional connectivity by incorporating information at the meso-scale (described  
612 by neural models whose parameters are typically defined based on animal studies) and the macro-scale  
613 (Friston et al., 2019). The latter has parameters reflecting forward, backward and lateral connections  
614 between sources, which can be defined from dMRI and/or structural MRI data. Similarly to Granger  
615 causality, DCM can also be applied to fMRI data, and the results used as connectivity priors for EEG source  
616 reconstruction (Lei et al., 2015). Naturally, these connectivity priors may be more crucial for studying EEG  
617 functional connectivity in the source space, which was not the case in the present study.

618 An alternative to the PEB framework for incorporating priors is the use of penalty functions (Lei et  
619 al., 2015). These constraint the inverse solutions using different types of norms and weight matrices that  
620 indirectly reflect a given prior, from which the MN and LORETA algorithms used here can be defined.  
621 Penalty functions have the advantage of easily balancing between sparse and smooth solutions by simply  
622 adjusting the norm accordingly, or combining multiple terms with different norms for intermediate solutions  
623 (Valdés-Sosa et al., 2009). However, the ability of explicitly incorporating spatial priors as covariance  
624 components in the inversion models designed under a PEB framework render it more interpretable, and  
625 therefore potentially more suitable for testing different types of fMRI spatial priors as it was performed here  
626 (López et al., 2014). Regardless, extending the present study by also comparing these two frameworks  
627 would be interesting to further inform researchers on not only the best combination of inversion algorithms  
628 and sets of covariance components, but also on the optimal framework.

## 629 **Conclusions**

630 In this study, we systematically compared the quality of the source reconstruction of EEG data  
631 performed using different combinations of four inversion algorithms and three sets of covariance  
632 components incorporating different types of spatial priors derived from concurrently acquired fMRI data.  
633 We found that according to the quality metrics reflecting the presence of neuronal activity, combining the  
634 EBB or MSP algorithms with CC sets including fMRI task activation maps and RSNs yields the overall  
635 best source reconstruction, and that by further including dFC state modules as spatial priors, the quality of  
636 EEG sources from the task runs is optimal. We show that incorporating fMRI spatial priors in general, and  
637 for the first time dFC state modules in particular, is thus crucial for optimizing the reconstruction of EEG  
638 sources (and consequently any subsequent analyses). By providing a clear recommendation on the best  
639 approach for tackling the challenging inverse problem supported by our comprehensive analyses, we believe  
640 that future studies, particularly using real EEG data, may then be more informatively guided on this intricate  
641 research field.

## 642 **Acknowledgements**

643 This work was supported by Grants Funded by Fundação para a Ciência e Tecnologia, PAC –286  
644 MEDPERSYST, POCI-01-0145-FEDER-016428, BIGDATIMAGE, CENTRO-01-0145-FEDER-000016  
645 financed by Centro 2020 FEDER, COMPETE, FCT UID/4950/2020 – COMPETE, CONNECT.BCI  
646 POCI-01-0145- FEDER-30852, and BIOMUSCLE PTDC/MEC-NEU/31973/2017. FCT also funded an  
647 individual grant to JVD (Individual Scientific Employment Stimulus 2017 - CEECIND/00581/2017).

## 648 **Figure and Table captions**

649 **Figure 1:** *Schematic diagram of the processing pipeline.* The pre-processed fMRI data is submitted to three  
650 different analyses in order to derive three types of fMRI spatial priors for EEG source reconstruction: 1)  
651 identification of RSNs through spatial ICA; 2) mapping of the task-related activity through GLM; and 3)  
652 by estimating the dFC fluctuations with phase coherence and the associated dFC states with dictionary  
653 learning, dFC state modules were obtained using the Louvain modularity algorithm. The covariance  
654 components (CCs) associated with these spatial priors were then included in several inversion algorithms,  
655 whose reconstruction quality was assessed by the free energy and variance explained of the associated  
656 models, and by the overlap of EEG source components (obtained through spatial ICA applied to the source  
657 reconstructed EEG) with ROIs and RSN templates.

658 **Figure 2:** *Deriving covariance components (CCs) from fMRI spatial priors.* The 3D fMRI spatial priors are  
659 first binarized, projected onto the 2D cortical surface using nearest-neighbor interpolation and smoothed  
660 using the Green's function. The associated CCs are then obtained by computing the outer product. For  
661 visualization purposes, the temporally reduced CCs are illustrated, by applying the same temporal projector  
662 considered when reducing the EEG data prior to its reconstruction.

663 **Figure 3:** *Illustration of the overlap between two EEG SCs (in red-yellow) and (A) the EBA mask (in blue)*  
664 *and (B) a visual RSN (in blue-light blue) from (Smith et al., 2009).* The dice coefficient  $d$  and the proportion  
665 of the ROIs contained in the respective SCs are also depicted.

666 **Table 1:** *Average FE and VE values across participants, and across three visual perception task runs, for all*  
667 *combinations of inversion algorithms and sets of covariance components. Values in bold represent the best*  
668 *across inversion algorithms for each CC set, and values in red represent the overall best (across inversion*  
669 *algorithms and CC sets).*



670 **Table 2:** Average  $d^*$  and  $p_{RS}^*$  values across participants, and across three visual perception task runs, for  
671 all combinations of inversion algorithms and sets of covariance components. Values in bold represent the  
672 best across inversion algorithms for each CC set, and values in red represent the overall best (across  
673 inversion algorithms and CC sets).

## 674 **References**

- 675 Abreu, R., Jorge, J., Leal, A., Koenig, T., Figueiredo, P., 2020a. EEG Microstates Predict Concurrent fMRI  
676 Dynamic Functional Connectivity States. *Brain Topogr.* 1, 3. doi:10.1007/s10548-020-00805-1
- 677 Abreu, R., Leal, A., Figueiredo, P., 2019. Identification of epileptic brain states by dynamic functional  
678 connectivity analysis of simultaneous EEG-fMRI: a dictionary learning approach. *Sci. Rep.* 9, 638.  
679 doi:10.1038/s41598-018-36976-y
- 680 Abreu, R., Leal, A., Figueiredo, P., 2018. EEG-Informed fMRI: A Review of Data Analysis Methods. *Front.*  
681 *Hum. Neurosci.* 12, 29. doi:10.3389/fnhum.2018.00029
- 682 Abreu, R., Leite, M., Jorge, J., Grouiller, F., van der Zwaag, W., Leal, A., Figueiredo, P., 2016.  
683 Ballistocardiogram artifact correction taking into account physiological signal preservation in  
684 simultaneous EEG-fMRI. *Neuroimage* 135, 45–63. doi:10.1016/j.neuroimage.2016.03.034
- 685 Abreu, R., Nunes, S., Leal, A., Figueiredo, P., 2017. Physiological noise correction using ECG-derived  
686 respiratory signals for enhanced mapping of spontaneous neuronal activity with simultaneous EEG-  
687 fMRI. *Neuroimage* 154, 115–127. doi:10.1016/J.NEUROIMAGE.2016.08.008
- 688 Abreu, R., Simões, M., Castelo-Branco, M., 2020b. Pushing the Limits of EEG: Estimation of Large-Scale  
689 Functional Brain Networks and Their Dynamics Validated by Simultaneous fMRI. *Front. Neurosci.*  
690 14, 323. doi:10.3389/fnins.2020.00323
- 691 Allen, E.A., Damaraju, E., Eichele, T., Wu, L., Calhoun, V.D., 2018. EEG Signatures of Dynamic  
692 Functional Network Connectivity States. *Brain Topogr.* 31, 101–116. doi:10.1007/s10548-017-0546-  
693 2
- 694 Allen, P.J., Josephs, O., Turner, R., 2000. A method for removing imaging artifact from continuous EEG  
695 recorded during functional MRI. *Neuroimage* 12, 230–239. doi:10.1006/nimg.2000.0599
- 696 Andersson, J.L.R., Skare, S., Ashburner, J., 2003. How to correct susceptibility distortions in spin-echo

- 697 echo-planar images: Application to diffusion tensor imaging. *Neuroimage* 20, 870–888.  
698 doi:10.1016/S1053-8119(03)00336-7
- 699 Beckmann, C.F., Smith, S.M., 2004. Probabilistic independent component analysis for functional magnetic  
700 resonance imaging. *IEEE Trans. Med. Imaging* 23, 137–52. doi:10.1109/TMI.2003.822821
- 701 Bradley, A., Yao, J., Dewald, J., Richter, C.P., 2016. Evaluation of electroencephalography source  
702 localization algorithms with multiple cortical sources. *PLoS One* 11, 1–14.  
703 doi:10.1371/journal.pone.0147266
- 704 Cabral, J., Vidaurre, D., Marques, P., Magalhães, R., Silva Moreira, P., Miguel Soares, J., Deco, G., Sousa,  
705 N., Kringelbach, M.L., 2017. Cognitive performance in healthy older adults relates to spontaneous  
706 switching between states of functional connectivity during rest. *Sci. Rep.* 7, 1–13.  
707 doi:10.1038/s41598-017-05425-7
- 708 Chang, C., Cunningham, J.P., Glover, G.H., 2009. Influence of heart rate on the BOLD signal: The cardiac  
709 response function. *Neuroimage* 44, 857–869. doi:10.1016/j.neuroimage.2008.09.029
- 710 Chang, C., Glover, G.H., 2009. Effects of model-based physiological noise correction on default mode  
711 network anti-correlations and correlations. *Neuroimage* 47, 1448–1459.  
712 doi:10.1016/j.neuroimage.2009.05.012
- 713 Chang, C., Liu, Z., Chen, M.C., Liu, X., Duyn, J.H., 2013. EEG correlates of time-varying BOLD functional  
714 connectivity. *Neuroimage* 72, 227–36. doi:10.1016/j.neuroimage.2013.01.049
- 715 Chang, D.H.F., Ban, H., Ikegaya, Y., Fujita, I., Troje, N.F., 2018. Cortical and subcortical responses to  
716 biological motion. *Neuroimage* 174, 87–96. doi:10.1016/j.neuroimage.2018.03.013
- 717 Chu, C.J., Tanaka, N., Diaz, J., Edlow, B.L., Wu, O., Hämäläinen, M., Stufflebeam, S., Cash, S.S., Kramer,  
718 M.A., 2015. EEG functional connectivity is partially predicted by underlying white matter  
719 connectivity. *Neuroimage* 108, 23–33. doi:10.1016/j.neuroimage.2014.12.033
- 720 Cole, M.W., Ito, T., Bassett, D.S., Schultz, D.H., 2016. Activity flow over resting-state networks shapes

- 721 cognitive task activations. *Nat. Neurosci.* 19, 1718–1726. doi:10.1038/nn.4406
- 722 Collins, D.L., Neelin, P., Peters, T.M., Evans, A.C., 1994. Automatic 3D intersubject registration of MR  
723 volumetric data in standardized Talairach space. *J. Comput. Assist. Tomogr.* 18, 192–205.
- 724 Custo, A., Vulliemoz, S., Grouiller, F., Van De Ville, D., Michel, C., 2014. EEG source imaging of brain  
725 states using spatiotemporal regression. *Neuroimage* 96, 106–116.  
726 doi:10.1016/j.neuroimage.2014.04.002
- 727 da Cruz, J.R., Chicherov, V., Herzog, M.H., Figueiredo, P., 2018. An automatic pre-processing pipeline for  
728 EEG analysis (APP) based on robust statistics. *Clin. Neurophysiol.* 129, 1427–1437.  
729 doi:10.1016/j.clinph.2018.04.600
- 730 De Peralta-Menendez, R.G., Gonzalez-Andino, S.L., 1998. A critical analysis of linear inverse solutions to  
731 the neuroelectromagnetic inverse problem. *IEEE Trans. Biomed. Eng.* 45, 440–448.  
732 doi:10.1109/10.664200
- 733 De Peralta-Menendez, R.G., Murray, M.M., Michel, C.M., Martuzzi, R., Gonzalez Andino, S.L., 2004.  
734 Electrical neuroimaging based on biophysical constraints. *Neuroimage* 21, 527–539.  
735 doi:10.1016/j.neuroimage.2003.09.051
- 736 Delorme, A., Makeig, S., 2004. EEGLAB: An open source toolbox for analysis of single-trial EEG  
737 dynamics including independent component analysis. *J. Neurosci. Methods* 134, 9–21.  
738 doi:10.1016/j.jneumeth.2003.10.009
- 739 Di, X., Gohel, S., Kim, E.H., Biswal, B.B., 2013. Task vs. rest—different network configurations between  
740 the coactivation and the resting-state brain networks. *Front. Hum. Neurosci.* 7.  
741 doi:10.3389/fnhum.2013.00493
- 742 Dice, L.R., 1945. Measures of the Amount of Ecologic Association Between Species. *Ecology* 26, 297–  
743 302. doi:10.2307/1932409
- 744 Figueroa, C.A., Cabral, J., Mocking, R.J.T., Rapuano, K.M., Hartevelt, T.J., Deco, G., Expert, P., Schene,

- 745 A.H., Kringelbach, M.L., Ruhé, H.G., 2019. Altered ability to access a clinically relevant control  
746 network in patients remitted from major depressive disorder. *Hum. Brain Mapp.* 40, 2771–2786.  
747 doi:10.1002/hbm.24559
- 748 Friston, K., Harrison, L., Daunizeau, J., Kiebel, S., Phillips, C., Trujillo-Barreto, N., Henson, R., Flandin,  
749 G., Mattout, J., 2008. Multiple sparse priors for the M/EEG inverse problem. *Neuroimage* 39, 1104–  
750 1120. doi:10.1016/j.neuroimage.2007.09.048
- 751 Friston, K.J., Preller, K.H., Mathys, C., Cagnan, H., Heinzle, J., Razi, A., Zeidman, P., 2019. Dynamic  
752 causal modelling revisited. *Neuroimage* 199, 730–744. doi:10.1016/j.neuroimage.2017.02.045
- 753 Glerean, E., Salmi, J., Lahnakoski, J.M., Jääskeläinen, I.P., Sams, M., 2012. Functional Magnetic  
754 Resonance Imaging Phase Synchronization as a Measure of Dynamic Functional Connectivity. *Brain*  
755 *Connect.* 2, 91–101. doi:10.1089/brain.2011.0068
- 756 Glover, G.H., Li, T.Q., Ress, D., 2000. Image-based method for retrospective correction of physiological  
757 motion effects in fMRI: RETROICOR. *Magn. Reson. Med.* 44, 162–167. doi:10.1002/1522-  
758 2594(200007)44:1<162::AID-MRM23>3.0.CO;2-E
- 759 Goldman, R.I., Stern, J.M., Engel, J., Cohen, M.S., 2002. Simultaneous EEG and fMRI of the alpha rhythm.  
760 *Neuroreport* 13, 2487–2492. doi:10.1097/00001756-200212200-00022
- 761 Gonçalves, N.R., Whelan, R., Foxe, J.J., Lalor, E.C., 2014. Towards obtaining spatiotemporally precise  
762 responses to continuous sensory stimuli in humans: A general linear modeling approach to EEG.  
763 *Neuroimage* 97, 196–205. doi:10.1016/j.neuroimage.2014.04.012
- 764 Goto, M., Abe, O., Miyati, T., Yamasue, H., Gomi, T., Takeda, T., 2016. Head motion and correction  
765 methods in resting-state functional MRI. *Magn. Reson. Med. Sci.* 15, 178–186.  
766 doi:10.2463/mrms.rev.2015-0060
- 767 Grech, R., Cassar, T., Muscat, J., Camilleri, K.P., Fabri, S.G., Zervakis, M., Xanthopoulos, P., Sakkalis, V.,  
768 Vanrumste, B., 2008. Review on solving the inverse problem in EEG source analysis. *J. Neuroeng.*

- 769 Rehabil. 5, 1–33. doi:10.1186/1743-0003-5-25
- 770 Groening, K., Brodbeck, V., Moeller, F., Wolff, S., van Baalen, A., Michel, C.M., Jansen, O., Boor, R.,  
771 Wiegand, G., Stephani, U., Siniatchkin, M., 2009. Combination of EEG–fMRI and EEG source  
772 analysis improves interpretation of spike-associated activation networks in paediatric  
773 pharmaco-resistant focal epilepsies. *Neuroimage* 46, 827–833. doi:10.1016/j.neuroimage.2009.02.026
- 774 Grooms, J.K., Thompson, G.J., Pan, W.-J., Billings, J., Schumacher, E.H., Epstein, C.M., Keilholz, S.D.,  
775 2017. Infralow Electroencephalographic and Dynamic Resting State Network Activity. *Brain*  
776 *Connect.* 7, 265–280. doi:10.1089/brain.2017.0492
- 777 Grova, C., Daunizeau, J., Lina, J.M., Bénar, C.G., Benali, H., Gotman, J., 2006. Evaluation of EEG  
778 localization methods using realistic simulations of interictal spikes. *Neuroimage* 29, 734–753.  
779 doi:10.1016/j.neuroimage.2005.08.053
- 780 Halder, T., Talwar, S., Jaiswal, A.K., Banerjee, A., 2019. Quantitative evaluation in estimating sources  
781 underlying brain oscillations using current source density methods and beamformer approaches.  
782 *eNeuro* 6, 1–14. doi:10.1523/ENEURO.0170-19.2019
- 783 Hämäläinen, M.S., Ilmoniemi, R.J., 1994. Interpreting magnetic fields of the brain: minimum norm  
784 estimates. *Med. Biol. Eng. Comput.* 32, 35–42. doi:10.1007/BF02512476
- 785 Harrison, L.M., Penny, W., Ashburner, J., Trujillo-Barreto, N., Friston, K.J., 2007. Diffusion-based spatial  
786 priors for imaging. *Neuroimage* 38, 677–695. doi:10.1016/j.neuroimage.2007.07.032
- 787 He, B., Sohrabpour, A., Brown, E., Liu, Z., 2018. Electrophysiological Source Imaging: A Noninvasive  
788 Window to Brain Dynamics. *Annu. Rev. Biomed. Eng.* 20, 171–196. doi:10.1146/annurev-bioeng-  
789 062117-120853
- 790 Hedrich, T., Pellegrino, G., Kobayashi, E., Lina, J.M., Grova, C., 2017. Comparison of the spatial resolution  
791 of source imaging techniques in high-density EEG and MEG. *Neuroimage* 157, 531–544.  
792 doi:10.1016/j.neuroimage.2017.06.022

- 793 Henson, R.N., Flandin, G., Friston, K.J., Mattout, J., 2010. A Parametric empirical bayesian framework for  
794 fMRI-constrained MEG/EEG source reconstruction. *Hum. Brain Mapp.* 31, 1512–1531.  
795 doi:10.1002/hbm.20956
- 796 Hutchison, R.M., Womelsdorf, T., Allen, E.A., Bandettini, P.A., Calhoun, V.D., Corbetta, M., Della Penna,  
797 S., Duyn, J.H., Glover, G.H., Gonzalez-Castillo, J., Handwerker, D.A., Keilholz, S., Kiviniemi, V.,  
798 Leopold, D.A., de Pasquale, F., Sporns, O., Walter, M., Chang, C., 2013. Dynamic functional  
799 connectivity: promise, issues, and interpretations. *Neuroimage* 80, 360–78.  
800 doi:10.1016/j.neuroimage.2013.05.079
- 801 Jenkinson, M., Bannister, P., Brady, M., Smith, S., 2002. Improved Optimization for the Robust and  
802 Accurate Linear Registration and Motion Correction of Brain Images. *Neuroimage* 17, 825–841.  
803 doi:10.1006/nimg.2002.1132
- 804 Jenkinson, M., Smith, S., 2001. A global optimisation method for robust affine registration of brain images.  
805 *Med. Image Anal.* 5, 143–156. doi:10.1016/S1361-8415(01)00036-6
- 806 Jo, H.J., Saad, Z.S., Simmons, W.K., Milbury, L. a., Cox, R.W., 2010. Mapping sources of correlation in  
807 resting state FMRI, with artifact detection and removal. *Neuroimage* 52, 571–582.  
808 doi:10.1016/j.neuroimage.2010.04.246
- 809 Knösche, T.R., Gräser, M., Anwander, A., 2013. Prior knowledge on cortex organization in the  
810 reconstruction of source current densities from EEG. *Neuroimage* 67, 7–24.  
811 doi:10.1016/j.neuroimage.2012.11.013
- 812 Korhonen, V., Hiltunen, T., Myllylä, T., Wang, X., Kantola, J., Nikkinen, J., Zang, Y.-F., LeVan, P.,  
813 Kiviniemi, V., 2014. Synchronous Multiscale Neuroimaging Environment for Critically Sampled  
814 Physiological Analysis of Brain Function: Hepta-Scan Concept. *Brain Connect.* 4, 677–689.  
815 doi:10.1089/brain.2014.0258
- 816 Laufs, H., Holt, J.L., Elfont, R., Krams, M., Paul, J.S., Krakow, K., Kleinschmidt, A., 2006. Where the

- 817 BOLD signal goes when alpha EEG leaves. *Neuroimage* 31, 1408–18.  
818 doi:10.1016/j.neuroimage.2006.02.002
- 819 Lee, M.H., Smyser, C.D., Shimony, J.S., 2013. Resting state fMRI: A review of methods and clinical  
820 applications. *AJNR Am J Neuroradiol* 34, 1866–1872. doi:10.3174/ajnr.A3263
- 821 Lei, X., 2012. Electromagnetic brain imaging based on standardized resting-state networks, in: 2012 5th  
822 International Conference on Biomedical Engineering and Informatics, BMEI 2012. pp. 40–44.  
823 doi:10.1109/BMEI.2012.6512901
- 824 Lei, X., Hu, J., Yao, D., 2012. Incorporating fMRI functional networks in EEG source imaging: A bayesian  
825 model comparison approach. *Brain Topogr.* 25, 27–38. doi:10.1007/s10548-011-0187-9
- 826 Lei, X., Qiu, C., Xu, P., Yao, D., 2010. A parallel framework for simultaneous EEG/fMRI analysis:  
827 Methodology and simulation. *Neuroimage* 52, 1123–1134. doi:10.1016/j.neuroimage.2010.01.024
- 828 Lei, X., Wu, T., Valdes-Sosa, P.A., 2015. Incorporating priors for EEG source imaging and connectivity  
829 analysis. *Front. Neurosci.* 9, 284. doi:10.3389/fnins.2015.00284
- 830 Lei, X., Xu, P., Luo, C., Zhao, J., Zhou, D., Yao, D., 2011. fMRI functional networks for EEG source  
831 imaging. *Hum. Brain Mapp.* 32, 1141–1160. doi:10.1002/hbm.21098
- 832 Liu, Q., Farahibozorg, S., Porcaro, C., Wenderoth, N., Mantini, D., 2017. Detecting large-scale networks in  
833 the human brain using high-density electroencephalography. *Hum. Brain Mapp.* 38, 4631–4643.  
834 doi:10.1002/hbm.23688
- 835 Liu, Q., Ganzetti, M., Wenderoth, N., Mantini, D., 2018. Detecting Large-Scale Brain Networks Using  
836 EEG: Impact of Electrode Density, Head Modeling and Source Localization. *Front. Neuroinform.* 12,  
837 1–11. doi:10.3389/fninf.2018.00004
- 838 López, J.D., Litvak, V., Espinosa, J.J., Friston, K., Barnes, G.R., 2014. Algorithmic procedures for Bayesian  
839 MEG/EEG source reconstruction in SPM. *Neuroimage* 84, 476–487.  
840 doi:10.1016/j.neuroimage.2013.09.002



- 841 Lord, L.D., Expert, P., Atasoy, S., Roseman, L., Rapuano, K., Lambiotte, R., Nutt, D.J., Deco, G., Carhart-  
842 Harris, R.L., Kringelbach, M.L., Cabral, J., 2019. Dynamical exploration of the repertoire of brain  
843 networks at rest is modulated by psilocybin. *Neuroimage* 199, 127–142.  
844 doi:10.1016/j.neuroimage.2019.05.060
- 845 Mairal, J., Bach, F., Ponce, J., Sapiro, G., 2010. Online Learning for Matrix Factorization and Sparse  
846 Coding. *J. Mach. Learn. Res.* 11, 19–60.
- 847 Maknojia, S., Churchill, N.W., Schweizer, T.A., Graham, S., 2019. Resting state fMRI: Going through the  
848 motions. *Front. Neurosci.* 13, 1–13. doi:10.3389/fnins.2019.00825
- 849 Marinazzo, D., Riera, J.J., Marzetti, L., Astolfi, L., Yao, D., Valdés Sosa, P.A., 2019. Controversies in EEG  
850 Source Imaging and Connectivity: Modeling, Validation, Benchmarking. *Brain Topogr.* 32, 527–529.  
851 doi:10.1007/s10548-019-00709-9
- 852 Michel, C.M., Brunet, D., 2019. EEG source imaging: A practical review of the analysis steps. *Front.*  
853 *Neurol.* 10. doi:10.3389/fneur.2019.00325
- 854 Michel, C.M., Murray, M.M., 2012. Towards the utilization of EEG as a brain imaging tool. *Neuroimage*  
855 61, 371–385. doi:10.1016/j.neuroimage.2011.12.039
- 856 Michel, C.M., Murray, M.M., Lantz, G., Gonzalez, S., Spinelli, L., Grave De Peralta, R., 2004. EEG source  
857 imaging. *Clin. Neurophysiol.* 115, 2195–2222. doi:10.1016/j.clinph.2004.06.001
- 858 Moosmann, M., Ritter, P., Krastel, I., Brink, A., Thees, S., Blankenburg, F., Taskin, B., Obrig, H.,  
859 Villringer, A., 2003. Correlates of alpha rhythm in functional magnetic resonance imaging and near  
860 infrared spectroscopy. *Neuroimage* 20, 145–158. doi:10.1016/S1053-8119(03)00344-6
- 861 Mullinger, K., Brookes, M., Stevenson, C., Morgan, P., Bowtell, R., 2008. Exploring the feasibility of  
862 simultaneous electroencephalography/functional magnetic resonance imaging at 7 T. *Magn. Reson.*  
863 *Imaging* 26, 968–977. doi:10.1016/j.mri.2008.02.014
- 864 Newman, M.E.J., 2006. Finding community structure in networks using the eigenvectors of matrices. *Phys.*

- 865 Rev. E - Stat. Nonlinear, Soft Matter Phys. 74, 036104. doi:10.1103/PhysRevE.74.036104
- 866 Niedermeyer, E., Lopes Da Silva, F.H., 2005. Electroencephalography: Basic Principles, Clinical  
867 Applications, and Related Fields, 6th ed. Wolters Kluwer Health.
- 868 Omidvarnia, A., Pedersen, M., Vaughan, D.N., Walz, J.M., Abbott, D.F., Zalesky, A., Jackson, G.D., 2017.  
869 Dynamic coupling between fMRI local connectivity and interictal EEG in focal epilepsy: A wavelet  
870 analysis approach. Hum. Brain Mapp. 38, 5356–5374. doi:10.1002/hbm.23723
- 871 Pascual-Marqui, R.D., Michel, C.M., Lehmann, D., 1994. Low resolution electromagnetic tomography: a  
872 new method for localizing electrical activity in the brain. Int. J. Psychophysiol. 18, 49–65.  
873 doi:10.1016/0167-8760(84)90014-X
- 874 Phillips, C., Mattout, J., Rugg, M.D., Maquet, P., Friston, K.J., 2005. An empirical Bayesian solution to the  
875 source reconstruction problem in EEG. Neuroimage 24, 997–1011.  
876 doi:10.1016/j.neuroimage.2004.10.030
- 877 Pion-Tonachini, L., Kreutz-Delgado, K., Makeig, S., 2019. ICLabel: An automated  
878 electroencephalographic independent component classifier, dataset, and website. Neuroimage 198,  
879 181–197. doi:10.1016/j.neuroimage.2019.05.026
- 880 Power, J.D., Barnes, K. a., Snyder, A.Z., Schlaggar, B.L., Petersen, S.E., 2012. Spurious but systematic  
881 correlations in functional connectivity MRI networks arise from subject motion. Neuroimage 59,  
882 2142–2154. doi:10.1016/j.neuroimage.2011.10.018
- 883 Preti, M.G., Bolton, T.A., Van De Ville, D., 2017. The dynamic functional connectome: State-of-the-art  
884 and perspectives. Neuroimage 160, 41–54. doi:10.1016/J.NEUROIMAGE.2016.12.061
- 885 Preti, M.G., Karahanoglu, F.I., Leonardi, N., Grouiller, F., Genetti, M., Seeck, M., Vulliemoz, S., Ville, D.  
886 Van De, 2014. Functional Network Dynamics in Epilepsy Revealed By Dynamic Functional  
887 Connectivity and Eeg 146318.
- 888 Roebroek, A., Formisano, E., Goebel, R., 2005. Mapping directed influence over the brain using Granger

- 889 causality and fMRI. *Neuroimage* 25, 230–242. doi:10.1016/j.neuroimage.2004.11.017
- 890 Rubinov, M., Sporns, O., 2010. Complex network measures of brain connectivity: Uses and interpretations.  
891 *Neuroimage* 52, 1059–1069. doi:10.1016/j.neuroimage.2009.10.003
- 892 Scheeringa, R., Bastiaansen, M.C.M., Petersson, K.M., Oostenveld, R., Norris, D.G., Hagoort, P., 2008.  
893 Frontal theta EEG activity correlates negatively with the default mode network in resting state. *Int. J.*  
894 *Psychophysiol.* 67, 242–251. doi:10.1016/j.ijpsycho.2007.05.017
- 895 Seto, E., Sela, G., McIlroy, W., Black, E., Staines, W., Bronskill, M., McIntosh, A., Graham, S., 2001.  
896 Quantifying head motion associated with motor tasks used in fMRI. *Neuroimage* 14, 284–297.  
897 doi:10.1006/nimg.2001.0829
- 898 Siniatchkin, M., Groening, K., Moehring, J., Moeller, F., Boor, R., Brodbeck, V., Michel, C.M., Rodionov,  
899 R., Lemieux, L., Stephani, U., 2010. Neuronal networks in children with continuous spikes and waves  
900 during slow sleep. *Brain* 133, 2798–813. doi:10.1093/brain/awq183
- 901 Smith, S.M., 2002. Fast robust automated brain extraction. *Hum. Brain Mapp.* 17, 143–55.  
902 doi:10.1002/hbm.10062
- 903 Smith, S.M., Fox, P.T., Miller, K.L., Glahn, D.C., Fox, P.M., Mackay, C.E., Filippini, N., Watkins, K.E.,  
904 Toro, R., Laird, A.R., Beckmann, C.F., 2009. Correspondence of the brain’s functional architecture  
905 during activation and rest. *Proc. Natl. Acad. Sci. U. S. A.* 106, 13040–13045.  
906 doi:10.1073/pnas.0905267106
- 907 Song, J., Desphande, A.S., Meier, T.B., Tudorascu, D.L., Vergun, S., Nair, V.A., Biswal, B.B., Meyerand,  
908 M.E., Birn, R.M., Bellec, P., Prabhakaran, V., 2012. Age-Related Differences in Test-Retest  
909 Reliability in Resting-State Brain Functional Connectivity. *PLoS One* 7, 1–16.  
910 doi:10.1371/journal.pone.0049847
- 911 Tagliazucchi, E., Laufs, H., 2015. Multimodal imaging of dynamic functional connectivity. *Front. Neurol.*  
912 6, 1–9. doi:10.3389/fneur.2015.00010

- 913 Tagliazucchi, E., von Wegner, F., Morzelewski, A., Brodbeck, V., Laufs, H., 2012. Dynamic BOLD  
914 functional connectivity in humans and its electrophysiological correlates. *Front. Hum. Neurosci.* 6,  
915 339. doi:10.3389/fnhum.2012.00339
- 916 Thompson, A.J., Banwell, B.L., Barkhof, F., Carroll, W.M., Coetzee, T., Comi, G., Correale, J., Fazekas,  
917 F., Filippi, M., Freedman, M.S., Fujihara, K., Galetta, S.L., Hartung, H.P., Kappos, L., Lublin, F.D.,  
918 Marrie, R.A., Miller, A.E., Miller, D.H., Montalban, X., Mowry, E.M., Sorensen, P.S., Tintoré, M.,  
919 Traboulsee, A.L., Trojano, M., Uitdehaag, B.M., Vukusic, S., Waubant, E., Weinshenker, B.G.,  
920 Reingold, S.C., Cohen, J.A., 2018. Diagnosis of multiple sclerosis: 2017 revisions of the McDonald  
921 criteria. *Lancet Neurol.* 17, 162–173. doi:10.1016/S1474-4422(17)30470-2
- 922 Thompson, G.J., 2018. Neural and metabolic basis of dynamic resting state fMRI. *Neuroimage* 180, 448–  
923 462. doi:10.1016/J.NEUROIMAGE.2017.09.010
- 924 Trujillo-Barreto, N.J., Aubert-Vázquez, E., Valdés-Sosa, P.A., 2004. Bayesian model averaging in  
925 EEG/MEG imaging. *Neuroimage* 21, 1300–1319. doi:10.1016/j.neuroimage.2003.11.008
- 926 Tzourio-Mazoyer, N., Landeau, B., Papathanassiou, D., Crivello, F., Etard, O., Delcroix, N., Mazoyer, B.,  
927 Joliot, M., 2002. Automated Anatomical Labeling of Activations in SPM Using a Macroscopic  
928 Anatomical Parcellation of the MNI MRI Single-Subject Brain. *Neuroimage* 15, 273–289.  
929 doi:10.1006/nimg.2001.0978
- 930 Valdés-Sosa, P.A., Vega-Hernández, M., Sánchez-Bornot, J.M., Martínez-Montes, E., Bobes, M.A., 2009.  
931 EEG source imaging with spatio-temporal tomographic nonnegative independent component analysis.  
932 *Hum. Brain Mapp.* 30, 1898–1910. doi:10.1002/hbm.20784
- 933 Vulliemoz, S., Lemieux, L., Daunizeau, J., Michel, C.M., Duncan, J.S., 2010a. The combination of EEG  
934 source imaging and EEG-correlated functional MRI to map epileptic networks. *Epilepsia* 51, 491–  
935 505. doi:10.1111/j.1528-1167.2009.02342.x
- 936 Vulliemoz, S., Rodionov, R., Carmichael, D.W., Thornton, R., Guye, M., Lhatoo, S.D., Michel, C.M.,

- 937 Duncan, J.S., Lemieux, L., 2010b. Continuous EEG source imaging enhances analysis of EEG-fMRI  
938 in focal epilepsy. *Neuroimage* 49, 3219–3229. doi:10.1016/j.neuroimage.2009.11.055
- 939 Vulliemoz, S., Thornton, R., Rodionov, R., Carmichael, D.W., Guye, M., Lhatoo, S., McEvoy, A.W.,  
940 Spinelli, L., Michel, C.M., Duncan, J.S., Lemieux, L., 2009. The spatio-temporal mapping of epileptic  
941 networks: Combination of EEG-fMRI and EEG source imaging. *Neuroimage* 46, 834–843.  
942 doi:10.1016/j.neuroimage.2009.01.070
- 943 Woolrich, M.W., Ripley, B.D., Brady, M., Smith, S.M., 2001. Temporal autocorrelation in univariate linear  
944 modeling of FMRI data. *Neuroimage* 14, 1370–86. doi:10.1006/nimg.2001.0931
- 945 Yao, J., Dewald, J.P.A., 2005. Evaluation of different cortical source localization methods using simulated  
946 and experimental EEG data. *Neuroimage* 25, 369–382. doi:10.1016/j.neuroimage.2004.11.036
- 947 Zhang, Y., Brady, M., Smith, S., 2001. Segmentation of brain MR images through a hidden Markov random  
948 field model and the expectation-maximization algorithm. *IEEE Trans. Med. Imaging* 20, 45–57.  
949 doi:10.1109/42.906424
